# Supplementary material for: Understanding the impacts of intensity and harvest frequency on Tithonia diversifolia for use in tropical silvopastoral systems
Source: Research Square preprint supplement (doi:10.21203/rs.3.rs-4273074/v1), 2024-04-19
Supplement: Supplementary file 1 [file 82864f13afd4e81c87370af5.xlsx]

## Sheet: Plan1
	Understanding the impacts of intensity and harvest frequency on Tithonia diversifolia for use in tropical silvopastoral systems; Agroforestry Systems; V. Ovani, S. Pérez-Márquez, A. Monteiro, A. M. Kruger, P. M. T. Lima, B. E. Bizzuti, L. S. Takahashi, H. Louvandini, and A. L. Abdalla; University of São Paulo; e-mail: vagnerovani@usp.br.
	intensity	frequency	block	cut/GP	DM.gkg	OM.gkg	FDN.gkg	DM.g	OM.g	FDN.g	h2	h4	h8	h14	h24	NetGP24h.mLgOM	NetCH424h.mLgOM	MOVD.g	DMO.gkg	FDND.g	DFDN.gkg	pH	Namoniacal	SCFAtotal	Acetico	Propionico	Butirico	Valerico	Isobutirico	Isovalerico	A:P	MOincubada	MOVD	MOndegrad	MO.AGV	MO.CO2.CH4.H2O	MO.Bio.Micro
	30	21	1	1	894.21	777.567	555.45	0.895	0.696	0.497	16.925	12.158	20.279	36.145	21.25	70.979	1.1	0.49	704.57	0.292	586.431	6.88	0.052	1.447	1.061	0.246	0.084	0.012	0.019	0.024	4.308	695.934	490.334	0.206	89.374	58.228	342.732
	30	21	2	1	896.955	793.31	524.19	0.897	0.712	0.47	17.756	12.06	23.884	42.763	23.453	84.138	3.543	0.449	630.783	0.208	441.227	6.76	0.058	1.454	1.052	0.252	0.098	0.014	0.018	0.02	4.17	711.777	448.977	0.263	90.495	59.053	299.429
	30	28	1	1	896.887	784.968	557.34	0.897	0.704	0.5	19.689	13.235	24.486	46.618	22.306	90.556	4.369	0.407	577.884	0.203	405.484	6.64	0.035	1.431	1.036	0.252	0.098	0.01	0.016	0.019	4.105	704.309	407.009	0.297	89.56	58.294	259.155
	30	28	2	1	896.888	751.366	480.51	0.898	0.674	0.431	15.916	10.269	13.001	31.377	21.29	56.075	0.218	0.482	714.426	0.239	553.452	6.84	0.057	1.445	1.065	0.235	0.087	0.013	0.019	0.027	4.542	674.43	481.83	0.193	88.977	58.687	334.166
	30	35	1	1	893.159	789.263	560.25	0.894	0.705	0.501	13.214	11.646	20.355	38.445	19.048	66.929	3.062	0.362	513.489	0.158	314.618	6.76	0.032	1.376	1.01	0.232	0.092	0.01	0.014	0.019	4.351	705.431	362.231	0.343	85.91	56.495	219.826
	30	35	2	1	892.45	795.244	608.13	0.893	0.71	0.543	16.418	14.168	28.706	50.749	26.11	100.373	4.796	0.348	490.371	0.181	333.565	6.6	0.034	1.455	1.042	0.265	0.107	0.01	0.012	0.019	3.929	709.928	348.128	0.362	91.609	59.336	197.183
	30	42	1	1	892.451	808.429	665.18	0.893	0.722	0.594	16.748	11.214	20.494	40.477	22.877	76.032	3.199	0.316	438.353	0.188	317.4	6.66	0.028	1.398	1.029	0.235	0.098	0.009	0.012	0.016	4.376	721.628	316.328	0.405	87.803	57.951	170.573
	30	42	2	1	904.987	823.79	661.42	0.906	0.746	0.599	17.601	14.637	20.813	38.991	21.637	77.901	2.73	0.33	442.066	0.183	305.101	6.76	0.036	1.368	1.001	0.235	0.097	0.009	0.01	0.016	4.256	745.967	329.767	0.416	86.014	56.495	187.257
	40	21	1	1	905.059	795.133	564.76	0.906	0.72	0.512	19.252	12.685	22.749	43.963	24.284	87.156	2.503	0.504	699.704	0.295	577.21	6.86	0.053	1.483	1.053	0.273	0.102	0.013	0.019	0.023	3.851	720.29	503.99	0.216	92.449	59.399	352.142
	40	21	2	1	907.674	788.75	546.79	0.908	0.716	0.497	17.902	12.928	21.161	37.176	21.247	74.636	2.185	0.485	677.782	0.266	535.198	6.78	0.045	1.443	1.045	0.249	0.093	0.012	0.021	0.024	4.202	716.286	485.486	0.231	89.355	58.26	337.871
	40	28	1	1	897.694	796.394	559.24	0.898	0.715	0.502	16.727	12.69	22.911	44.534	25.402	86.484	3.86	0.431	602.911	0.218	434.519	6.64	0.035	1.43	1.03	0.254	0.101	0.011	0.016	0.018	4.053	715.204	431.204	0.284	89.559	58.256	283.389
	40	28	2	1	897.161	787.603	536.92	0.898	0.707	0.482	17.61	10.921	16.741	33.309	20.042	62.844	0.827	0.434	613.287	0.209	432.734	7.03	0.046	1.459	1.089	0.232	0.082	0.011	0.021	0.024	4.691	707.243	433.743	0.274	89.788	59.381	284.573
	40	35	1	1	882.775	792.201	582.46	0.883	0.7	0.514	19.734	16.66	27.285	47.194	28.602	103.697	4.434	0.403	576.624	0.218	424.169	6.71	0.03	1.489	1.074	0.271	0.101	0.011	0.013	0.019	3.964	699.615	403.415	0.296	93.524	60.401	249.49
	40	35	2	1	910.427	799.896	584.44	0.911	0.729	0.533	13.631	14.137	26.526	46.056	24.503	89.075	4.429	0.384	526.137	0.187	351.445	6.78	0.024	1.451	1.049	0.259	0.098	0.011	0.015	0.019	4.052	728.902	383.502	0.345	90.866	58.947	233.689
	40	42	1	1	901.948	803.94	615.77	0.902	0.725	0.556	16.744	13.187	23.264	42.887	24.873	85.177	3.04	0.361	497.019	0.191	343.316	6.9	0.027	1.426	1.042	0.252	0.093	0.01	0.012	0.017	4.131	725.475	360.575	0.365	89.439	58.091	213.045
	40	42	2	1	915.289	824.174	588.76	0.916	0.755	0.539	18.531	14.462	25.203	45.687	23.82	91.926	4.441	0.314	415.599	0.098	181.928	6.85	0.032	1.449	1.032	0.276	0.102	0.01	0.012	0.017	3.744	754.961	313.761	0.441	91.391	58.43	163.939
	30	21	1	1	894.21	777.567	555.45	0.895	0.696	0.497	15.694	15.076	24.435	45.074	26.378	76.381	2.504	0.536	769.737	0.337	677.658	7.01	0.051	1.384	0.999	0.223	0.092	0.012	0.026	0.032	4.478	695.725	535.525	0.16	84.63	56.03	394.865
	30	21	2	1	896.955	793.31	524.19	0.897	0.712	0.47	18.451	19.141	34.162	48.296	26.738	96.512	42.031	0.49	688.745	0.249	528.946	6.81	0.047	1.419	1.015	0.234	0.096	0.015	0.027	0.032	4.34	711.635	490.135	0.221	86.731	57.118	346.286
	30	28	1	1	896.887	784.968	557.34	0.898	0.705	0.5	17.413	18.372	33.802	45.897	25.869	91.077	7.174	0.439	623.223	0.235	469.341	6.8	0.037	1.363	0.97	0.234	0.094	0.012	0.024	0.029	4.148	704.661	439.161	0.266	83.856	54.785	300.52
	30	28	2	1	896.888	751.366	480.51	0.898	0.674	0.431	13.82	12.818	19.558	41.665	25.296	62.88	1.188	0.473	702	0.23	534.023	7	0.053	1.379	1.002	0.213	0.088	0.013	0.028	0.035	4.7	674.498	473.498	0.201	83.684	55.786	334.028
	30	35	1	1	893.159	789.263	560.25	0.894	0.705	0.501	16.267	17.486	32.73	41.592	24.368	82.167	4.811	0.379	537.449	0.174	348.372	6.87	0.035	1.392	1	0.235	0.094	0.011	0.022	0.03	4.262	705.219	379.019	0.326	85.763	56.266	236.991
	30	35	2	1	892.45	795.244	608.13	0.893	0.71	0.543	15.63	16.408	34.915	45.356	25.835	87.869	5.492	0.35	492.507	0.183	336.357	6.91	0.039	1.339	0.956	0.232	0.094	0.01	0.02	0.027	4.117	710.354	349.854	0.36	82.919	54.132	212.803
	30	42	1	1	892.451	808.429	665.18	0.893	0.722	0.594	15.8	16.396	30.773	40.278	25.413	78.384	6.416	0.327	452.455	0.199	334.539	6.87	0.036	1.334	0.971	0.215	0.091	0.01	0.019	0.028	4.515	722.133	326.733	0.395	82.271	54.597	189.864
	30	42	2	1	904.987	823.79	661.42	0.906	0.746	0.599	15.126	16.938	28.628	41.12	23.441	74.977	5.687	0.321	429.77	0.174	289.786	6.85	0.025	1.367	0.988	0.226	0.094	0.011	0.022	0.026	4.368	746.19	320.69	0.425	84.427	55.72	180.543
	40	21	1	1	905.059	795.133	564.76	0.905	0.72	0.511	16.111	16.197	32.331	40.503	25.928	80.793	6.129	0.525	729.171	0.316	618.696	6.91	0.043	1.425	1.019	0.244	0.095	0.012	0.025	0.031	4.17	719.642	524.742	0.195	87.62	57.175	379.947
	40	21	2	1	907.674	788.75	546.79	0.908	0.717	0.497	15.067	13.352	30.415	41.366	26.642	76.566	5.355	0.535	746.406	0.315	634.189	7.04	0.039	1.439	1.033	0.235	0.096	0.013	0.029	0.033	4.393	716.501	534.801	0.182	87.879	57.961	388.96
	40	28	1	1	897.694	796.394	559.24	0.898	0.715	0.502	15.96	15.616	35.38	46.871	27.646	91.197	7.488	0.446	623.174	0.233	463.375	6.84	0.035	1.437	1.029	0.245	0.099	0.012	0.024	0.028	4.202	714.918	445.518	0.269	88.66	58.059	298.799
	40	28	2	1	897.161	787.603	536.92	0.898	0.707	0.482	13.793	10.231	22.222	46.878	24.134	66.982	1.957	0.443	626.004	0.218	451.389	7	0.053	1.4	1.016	0.218	0.09	0.012	0.03	0.034	4.653	706.96	442.56	0.264	85.086	56.64	300.835
	40	35	1	1	882.775	792.201	582.46	0.883	0.699	0.514	18.336	19.478	38.101	52.659	29.668	107.965	8.723	0.367	524.834	0.182	353.73	6.83	0.046	1.442	1.028	0.254	0.098	0.011	0.021	0.029	4.045	699.335	367.035	0.332	89.23	57.938	219.868
	40	35	2	1	910.427	799.896	584.44	0.911	0.729	0.532	16.837	17.511	35.214	49.606	27.796	96.688	8.399	0.393	539.078	0.197	369.157	6.91	0.027	1.468	1.04	0.255	0.104	0.013	0.024	0.031	4.072	728.757	392.857	0.336	90.582	59.063	243.212
	40	42	1	1	901.948	803.94	615.77	0.903	0.726	0.556	15.723	15.977	31.892	51.424	23.765	88.504	5.454	0.332	456.932	0.162	290.979	6.95	0.032	1.369	0.982	0.234	0.095	0.011	0.02	0.028	4.199	725.692	331.592	0.394	84.627	55.431	191.534
	40	42	2	1	915.289	824.174	588.76	0.916	0.755	0.539	17.394	16.987	30.414	46.262	26.752	87.532	5.696	0.358	473.827	0.142	263.439	6.74	0.026	1.438	1.018	0.266	0.099	0.011	0.018	0.025	3.827	754.885	357.685	0.397	89.633	57.549	210.504
	30	21	1	1	894.21	777.567	555.45	0.895	0.696	0.497	22.049	12.161	22.314	47.188	31.32	88.011	3.827	0.505	726.212	0.307	616.728	6.93	0.043	1.518	1.103	0.242	0.105	0.012	0.026	0.03	4.553	695.795	505.295	0.19	93.412	62.14	349.743
	30	21	2	1	896.955	793.31	524.19	0.897	0.712	0.47	21.806	12.833	28.623	50.429	27.156	93.827	7.272	0.516	725.277	0.275	584.234	6.93	0.049	1.492	1.063	0.241	0.121	0.015	0.025	0.028	4.405	711.99	516.39	0.196	92.3	61.665	362.426
	30	28	1	1	896.887	784.968	557.34	0.897	0.704	0.5	21	15.591	29.985	50.199	26.146	95.901	7.942	0.394	559.95	0.19	380.226	6.79	0.035	1.457	1.035	0.233	0.128	0.011	0.023	0.026	4.435	704.239	394.339	0.31	90.715	61.041	242.583
	30	28	2	1	896.888	751.366	480.51	0.897	0.674	0.431	19.211	10.55	16.02	40.153	23.769	62.682	2.188	0.488	724.288	0.245	568.873	6.96	0.043	1.495	1.078	0.222	0.114	0.014	0.031	0.037	4.859	673.891	488.091	0.186	91.192	61.824	335.075
	30	35	1	1	893.159	789.263	560.25	0.893	0.705	0.501	18.098	13.219	26.688	44.384	23.238	78.606	5.861	0.39	553.002	0.185	370.283	6.78	0.032	1.385	0.999	0.215	0.115	0.01	0.021	0.025	4.648	705.149	389.949	0.315	86.019	58.141	245.789
	30	35	2	1	892.45	795.244	608.13	0.893	0.71	0.543	19.176	14.679	28.948	48.383	23.5	87.665	6.351	0.352	495.745	0.185	340.591	6.93	0.023	1.37	0.963	0.228	0.126	0.01	0.019	0.024	4.232	710.354	352.154	0.358	85.815	57.432	208.908
	30	42	1	1	892.451	808.429	665.18	0.893	0.722	0.594	19.545	13.59	24.48	43.685	20.481	74.762	5.151	0.353	489.378	0.225	379.414	6.94	0.027	1.338	0.966	0.205	0.119	0.009	0.017	0.022	4.708	722.06	353.36	0.369	83.693	56.959	212.708
	30	42	2	1	904.987	823.79	661.42	0.906	0.746	0.599	17.02	14.056	24.429	40.214	22.536	71.235	5.433	0.332	444.512	0.185	308.146	6.82	0.021	1.354	0.971	0.209	0.124	0.01	0.018	0.023	4.65	746.19	331.69	0.414	84.648	57.598	189.444
	40	21	1	1	905.059	795.133	564.76	0.905	0.72	0.511	17.136	14.489	31.562	56.381	28.745	101.293	8.44	0.549	763.355	0.341	666.824	6.96	0.036	1.522	1.063	0.255	0.131	0.013	0.028	0.031	4.167	719.642	549.342	0.17	94.282	62.632	392.428
	40	21	2	1	907.674	788.75	546.79	0.908	0.717	0.497	16.01	11.981	24.927	50.54	30.329	86.767	5.294	0.569	794.138	0.349	703.043	6.78	0.048	1.542	1.1	0.246	0.125	0.013	0.029	0.03	4.468	716.501	569.001	0.148	95.273	63.828	409.899
	40	28	1	1	897.694	796.394	559.24	0.898	0.715	0.502	17.163	13.382	27.646	52.886	25.756	89.813	3.224	0.406	568.342	0.193	385.291	6.87	0.031	1.446	1.031	0.231	0.128	0.011	0.02	0.024	4.469	714.918	406.318	0.309	90.292	60.857	255.168
	40	28	2	1	897.161	787.603	536.92	0.898	0.707	0.482	17.175	12.832	18.044	43.645	26.643	71.32	2.556	0.51	720.746	0.285	590.366	6.85	0.044	1.479	1.077	0.224	0.11	0.012	0.027	0.03	4.805	707.243	509.743	0.198	90.967	61.414	357.361
	40	35	1	1	882.775	792.201	582.46	0.884	0.7	0.515	19.285	16.301	31.045	57.176	33.064	109.85	5.746	0.414	592.122	0.229	445.247	6.75	0.036	1.522	1.08	0.259	0.132	0.011	0.017	0.022	4.164	699.965	414.465	0.285	95.688	63.492	255.285
	40	35	2	1	910.427	799.896	584.44	0.911	0.729	0.532	17.093	13.468	29.825	50.796	29.572	93.734	5.184	0.475	651.392	0.278	522.876	6.76	0.023	1.524	1.091	0.249	0.13	0.011	0.019	0.024	4.378	728.611	474.611	0.254	95.434	63.886	315.291
	40	42	1	1	901.948	803.94	615.77	0.902	0.725	0.556	17	13.697	28.856	45.178	24.452	82.161	6.569	0.338	465.676	0.168	302.394	6.94	0.028	1.421	1.017	0.224	0.127	0.01	0.019	0.024	4.534	725.402	337.802	0.388	88.874	60.095	188.834
	40	42	2	1	915.289	824.174	588.76	0.916	0.755	0.539	16.902	14.786	31.222	49.751	23.655	89.296	6.025	0.323	427.842	0.107	199.066	6.82	0.028	1.519	1.069	0.259	0.142	0.011	0.016	0.022	4.132	755.036	323.036	0.432	95.831	63.882	163.323
	30	21	1	1	894.21	777.567	555.45	0.895	0.696	0.497	16.748	12.6	22.486	39.146	25.487	78.478	1.306	0.583	838.347	0.385	773.704	6.74	0.055	1.74	1.236	0.312	0.116	0.018	0.027	0.031	3.969	695.934	583.434	0.112	107.505	69.416	406.514
	30	21	2	1	896.955	793.31	524.19	0.897	0.712	0.47	16.802	14.472	27.501	45.166	25.517	91.468	4.605	0.561	788.34	0.32	679.673	6.73	0.047	1.725	1.214	0.307	0.125	0.02	0.029	0.03	3.96	711.99	561.29	0.151	106.641	69.224	385.425
	30	28	1	1	896.887	784.968	557.34	0.897	0.704	0.5	17.688	13.588	27.286	44.189	25.192	89.953	4.06	0.515	731.856	0.311	622.34	6.64	0.04	1.707	1.175	0.333	0.129	0.018	0.024	0.027	3.523	704.098	515.298	0.189	106.645	67.681	340.971
	30	28	2	1	896.888	751.366	480.51	0.898	0.674	0.431	14.548	11.543	14.002	30.645	20.924	53.672	0.131	0.563	835.137	0.32	742.206	6.82	0.047	1.687	1.214	0.287	0.107	0.018	0.029	0.033	4.232	674.498	563.298	0.111	103.531	67.555	392.212
	30	35	1	1	893.159	789.263	560.25	0.893	0.705	0.5	16.97	12.613	26.556	34.463	20.107	72.72	3.769	0.472	669.9	0.268	534.965	6.68	0.034	1.624	1.148	0.296	0.115	0.015	0.023	0.028	3.883	704.937	472.237	0.233	100.953	65.119	306.166
	30	35	2	1	892.45	795.244	608.13	0.893	0.71	0.543	17.799	15.636	32.939	46.499	26.105	100.989	5.612	0.452	636.937	0.285	525.228	6.6	0.032	1.698	1.185	0.318	0.132	0.015	0.022	0.027	3.73	710.07	452.27	0.258	106.324	68.445	277.502
	30	42	1	1	892.451	808.429	665.18	0.893	0.722	0.594	17.683	13.937	23.896	36.982	21.087	75.596	3.589	0.397	550.506	0.269	453.705	6.65	0.032	1.617	1.154	0.288	0.119	0.012	0.019	0.023	4.001	721.7	397.3	0.324	101.173	65.833	230.293
	30	42	2	1	904.987	823.79	661.42	0.905	0.746	0.599	16.042	12.664	24.444	35.131	19.254	69.545	3.504	0.39	522.49	0.243	405.267	6.7	0.03	1.585	1.124	0.291	0.117	0.012	0.019	0.023	3.867	745.743	389.643	0.356	99.308	64.15	226.185
	40	21	1	1	905.059	795.133	564.76	0.906	0.72	0.512	15.926	14.05	28.719	43.451	22.237	86.394	4.245	0.569	789.807	0.36	704.066	6.79	0.046	1.703	1.18	0.319	0.126	0.017	0.029	0.032	3.701	720.29	568.89	0.151	105.563	67.624	395.703
	40	21	2	1	907.674	788.75	546.79	0.908	0.716	0.496	17.134	13.702	24.768	36.583	21.423	75.62	2.592	0.553	772.252	0.333	671.471	6.94	0.054	1.71	1.203	0.304	0.121	0.017	0.033	0.032	3.959	716.143	553.043	0.163	105.395	68.299	379.349
	40	28	1	1	897.694	796.394	559.24	0.898	0.715	0.502	16.727	10.37	24.543	41.699	21.021	76.37	3.708	0.501	699.946	0.288	572.703	6.63	0.041	1.661	1.173	0.303	0.124	0.014	0.022	0.025	3.875	715.204	500.604	0.215	103.784	67.146	329.673
	40	28	2	1	897.161	787.603	536.92	0.898	0.707	0.482	15.005	10.923	20.218	37.134	22.65	67.94	1.734	0.529	748.01	0.304	630.359	6.7	0.048	1.72	1.236	0.294	0.113	0.017	0.028	0.032	4.199	707.172	528.972	0.178	105.964	69.175	353.833
	40	35	1	1	882.775	792.201	582.46	0.884	0.7	0.515	16.827	15.511	31.747	42.782	23.322	92.2	5.192	0.433	617.981	0.247	480.417	6.6	0.037	1.727	1.214	0.328	0.125	0.015	0.02	0.025	3.705	699.965	432.565	0.267	108.192	69.171	255.201
	40	35	2	1	910.427	799.896	584.44	0.911	0.728	0.532	16.253	13.808	26.795	40.012	21.988	80.866	4.266	0.473	649.263	0.277	519.962	6.65	0.032	1.737	1.223	0.324	0.127	0.015	0.021	0.026	3.781	728.465	472.965	0.255	108.627	69.823	294.515
	40	42	1	1	901.948	803.94	615.77	0.902	0.725	0.556	15.138	11.665	26.656	36.035	22.083	73.588	3.786	0.411	565.99	0.241	433.364	6.64	0.03	1.676	1.185	0.317	0.12	0.013	0.016	0.024	3.742	725.33	410.53	0.315	105.235	67.38	237.915
	40	42	2	1	915.289	824.174	588.76	0.915	0.755	0.539	18.949	13.575	26.766	38.061	21.066	80.428	4.004	0.361	477.938	0.145	269.193	6.6	0.031	1.64	1.153	0.317	0.121	0.012	0.015	0.021	3.644	754.508	360.608	0.394	103.397	65.944	191.266
	30	21	1	1	894.21	777.567	555.45	0.895	0.696	0.497	17.726	11.81	20.817	34.57	24.173	63.12	1.849	0.518	744.845	0.319	642.812	6.87	0.055	1.594	1.13	0.26	0.108	0.017	0.037	0.043	4.349	695.656	518.156	0.178	96.573	63.667	357.915
	30	21	2	1	896.955	793.31	524.19	0.898	0.712	0.471	18.871	13.436	34.055	47.146	27.757	95.289	8.797	0.572	803.528	0.331	702.659	6.72	0.057	1.709	1.202	0.293	0.116	0.019	0.038	0.042	4.106	712.061	572.161	0.14	104.028	67.788	400.345
	30	28	1	1	896.887	784.968	557.34	0.897	0.704	0.5	16.546	14.54	30.935	42.597	29.714	88.356	7.426	0.477	677.763	0.273	546.155	6.71	0.045	1.697	1.193	0.302	0.116	0.015	0.034	0.037	3.955	704.45	477.45	0.227	104.239	67.407	305.804
	30	28	2	1	896.888	751.366	480.51	0.897	0.674	0.431	13.466	7.815	14.925	34.498	25.316	50.043	0.08	0.549	815.271	0.307	711.141	6.89	0.058	1.637	1.164	0.271	0.105	0.018	0.036	0.044	4.3	673.959	549.459	0.125	99.185	65.033	385.241
	30	35	1	1	893.159	789.263	560.25	0.894	0.705	0.501	17.397	12.868	30.375	39.846	24.104	78.615	6.979	0.465	658.864	0.26	519.418	6.55	0.038	1.618	1.143	0.289	0.106	0.014	0.028	0.038	3.959	705.29	464.69	0.241	99.331	64.073	301.285
	30	35	2	1	892.45	795.244	608.13	0.893	0.71	0.543	17.799	12.608	34.237	45.461	26.624	90.753	8.004	0.465	654.4	0.298	548.064	6.66	0.041	1.698	1.192	0.308	0.121	0.015	0.026	0.037	3.875	710.07	464.67	0.245	105.023	67.776	291.871
	30	42	1	1	892.451	808.429	665.18	0.893	0.722	0.594	17.332	13.589	27.37	39.938	22.861	75.113	5.927	0.401	554.929	0.273	459.082	6.68	0.032	1.602	1.144	0.272	0.111	0.013	0.027	0.034	4.215	722.133	400.733	0.321	98.622	64.66	237.451
	30	42	2	1	904.987	823.79	661.42	0.906	0.746	0.599	15.376	12.824	27.316	34.129	22.623	66.292	4.95	0.377	504.987	0.23	383.468	6.69	0.035	1.546	1.106	0.263	0.106	0.012	0.026	0.033	4.201	746.041	376.741	0.369	95.212	62.326	219.204
	40	21	1	1	905.059	795.133	564.76	0.906	0.72	0.511	16.441	12.432	30.858	37.318	24.972	76.045	5.085	0.559	776.295	0.35	685.043	6.76	0.05	1.638	1.137	0.29	0.115	0.017	0.035	0.044	3.923	720.146	559.046	0.161	99.901	64.65	394.496
	40	21	2	1	907.674	788.75	546.79	0.908	0.717	0.497	15.752	8.893	34.184	44.191	26.039	83.083	6.162	0.564	787.042	0.344	692.806	6.74	0.054	1.682	1.176	0.289	0.116	0.018	0.04	0.043	4.062	716.572	563.972	0.153	102.281	66.601	395.09
	40	28	1	1	897.694	796.394	559.24	0.898	0.715	0.502	16.725	14.062	32.013	38.689	26.172	81.685	6.538	0.508	710.601	0.295	587.877	6.63	0.045	1.664	1.183	0.29	0.114	0.014	0.027	0.035	4.086	715.276	508.276	0.207	102.607	66.811	338.858
	40	28	2	1	897.161	787.603	536.92	0.898	0.707	0.482	15.446	10.753	18.401	38.192	25.527	62.342	0.095	0.525	742.11	0.3	621.703	6.8	0.046	1.64	1.167	0.269	0.107	0.017	0.037	0.043	4.341	706.889	524.589	0.182	99.392	65.359	359.837
	40	35	1	1	882.775	792.201	582.46	0.883	0.7	0.515	16.829	16.829	31.838	44.542	27.45	91.512	5.447	0.409	583.795	0.223	433.921	6.7	0.038	1.653	1.172	0.298	0.111	0.014	0.024	0.033	3.93	699.895	408.595	0.291	102.277	65.949	240.369
	40	35	2	1	910.427	799.896	584.44	0.911	0.729	0.532	15.32	14.561	33.528	44.633	30.83	92.895	7.771	0.501	687.824	0.305	572.74	6.65	0.037	1.717	1.21	0.313	0.115	0.015	0.027	0.037	3.859	728.757	501.257	0.227	106	68.081	327.176
	40	42	1	1	901.948	803.94	615.77	0.902	0.726	0.556	16.657	14.456	32.829	40.258	29.019	87.244	6.054	0.428	589.689	0.258	464.304	6.74	0.038	1.689	1.188	0.307	0.117	0.014	0.024	0.038	3.869	725.547	427.847	0.298	104.438	67.273	256.137
	40	42	2	1	915.289	824.174	588.76	0.916	0.755	0.539	18.374	12.757	31.723	41.306	28.874	87.057	6.344	0.42	557.063	0.205	379.956	6.62	0.037	1.703	1.186	0.328	0.12	0.014	0.022	0.034	3.619	754.735	420.435	0.334	106.036	67.341	247.058
	30	21	1	1	894.21	777.567	555.45	0.895	0.696	0.497	18.871	9.953	23.285	40.037	25.139	74.504	3.211	0.535	768.323	0.336	675.678	6.78	0.055	1.656	1.166	0.272	0.125	0.018	0.035	0.04	4.282	695.795	534.595	0.161	101.211	66.984	366.4
	30	21	2	1	896.955	793.31	524.19	0.898	0.712	0.471	14.383	12.485	31.895	48.09	24.563	88.635	5.667	0.537	754.681	0.296	628.733	6.6	0.048	1.659	1.161	0.267	0.136	0.019	0.038	0.038	4.351	712.133	537.433	0.175	101.505	67.788	368.139
	30	28	1	1	896.887	784.968	557.34	0.897	0.704	0.5	15.858	12.018	28.423	39.918	23.536	76.972	5.657	0.472	669.899	0.267	535.08	6.57	0.042	1.638	1.146	0.273	0.137	0.015	0.032	0.033	4.201	704.028	471.628	0.232	101.162	67.173	303.293
	30	28	2	1	896.888	751.366	480.51	0.897	0.674	0.431	15.464	8.54	17.924	41.405	25.03	65.58	1.779	0.561	832.566	0.318	738.186	6.62	0.05	1.687	1.206	0.269	0.117	0.016	0.037	0.042	4.481	674.295	561.395	0.113	102.686	68.184	390.525
	30	35	1	1	893.159	789.263	560.25	0.894	0.706	0.501	17.216	11.905	24.617	39.656	20.96	71.573	5.462	0.444	629.52	0.239	478.08	6.64	0.031	1.584	1.123	0.262	0.127	0.013	0.027	0.032	4.286	705.572	444.172	0.261	98.032	65.117	281.022
	30	35	2	1	892.45	795.244	608.13	0.893	0.71	0.543	17.547	11.834	29.231	47.21	28.019	91.06	7.334	0.477	672.296	0.31	571.465	6.51	0.037	1.661	1.154	0.301	0.142	0.013	0.021	0.031	3.835	709.786	477.186	0.233	104.042	67.859	305.285
	30	42	1	1	892.451	808.429	665.18	0.893	0.722	0.594	15.89	13.252	23.804	39.865	22.613	72.643	4.355	0.368	509.5	0.24	403.869	6.63	0.028	1.565	1.101	0.261	0.138	0.012	0.024	0.03	4.212	721.916	367.816	0.354	97.579	65.027	205.211
	30	42	2	1	904.987	823.79	661.42	0.906	0.746	0.599	14.966	11.754	25.919	40.638	23.696	74.192	5.549	0.41	549.175	0.263	438.504	6.59	0.035	1.675	1.225	0.272	0.129	0.009	0.014	0.026	4.505	745.967	409.667	0.336	105.074	70.19	234.403
	40	21	1	1	905.059	795.133	564.76	0.906	0.72	0.512	15.842	13.284	33.243	44.053	22.41	86.051	6.173	0.587	815.056	0.378	739.615	6.68	0.039	1.623	1.115	0.284	0.137	0.016	0.034	0.037	3.924	720.218	587.018	0.133	100.017	65.56	421.441
	40	21	2	1	907.674	788.75	546.79	0.908	0.716	0.496	15.594	11.819	27.521	37.109	22.888	72.149	4.408	0.556	775.955	0.336	676.813	6.82	0.045	1.662	1.174	0.272	0.13	0.017	0.031	0.038	4.318	715.928	555.528	0.16	102.112	67.84	385.577
	40	28	1	1	897.694	796.394	559.24	0.899	0.716	0.502	15.774	12.082	27.965	41.249	24.273	78.561	3.781	0.498	696.183	0.285	567.344	6.78	0.038	1.63	1.151	0.277	0.133	0.014	0.024	0.03	4.151	715.562	498.162	0.217	101.374	66.995	329.792
	40	28	2	1	897.161	787.603	536.92	0.898	0.707	0.482	15.271	11.186	18.399	34.104	25.264	61.442	1.965	0.551	778.913	0.326	675.689	6.74	0.039	1.653	1.158	0.285	0.138	0.014	0.027	0.031	4.063	706.96	550.66	0.156	102.825	67.78	380.055
	40	35	1	1	882.775	792.201	582.46	0.883	0.7	0.514	16.307	16.834	32.462	48.155	26.317	97.294	7.195	0.427	610.11	0.242	469.713	6.62	0.038	1.615	1.125	0.281	0.142	0.013	0.022	0.03	4.001	699.685	426.885	0.273	100.957	66.602	259.326
	40	35	2	1	910.427	799.896	584.44	0.911	0.728	0.532	15.663	13.218	33.963	47.096	25.951	93.109	7.687	0.5	686.052	0.304	570.314	6.63	0.041	1.693	1.185	0.298	0.14	0.014	0.024	0.032	3.973	728.465	499.765	0.229	105.583	69.217	324.965
	40	42	1	1	901.948	803.94	615.77	0.902	0.725	0.556	16.747	13.952	29.79	45.436	24.454	87.599	7.504	0.425	585.292	0.255	458.563	6.73	0.043	1.653	1.159	0.279	0.146	0.013	0.023	0.032	4.149	725.33	424.53	0.301	103.129	68.527	252.873
	40	42	2	1	915.289	824.174	588.76	0.915	0.755	0.539	16.507	13.82	32.872	44.656	26.358	91.431	7.688	0.407	539.965	0.192	356.022	6.94	0.035	1.74	1.198	0.313	0.164	0.014	0.02	0.032	3.83	754.508	407.408	0.347	109.544	72.004	225.861
	30	21	3	1	900.531	801.146	499.31	0.901	0.721	0.45	14.283	12.665	19.221	41.338	24.926	74.401	1.934	0.545	755.772	0.273	608.135	7.15	0.044	1.252	0.942	0.186	0.087	0.012	0.006	0.019	5.061	721.457	545.257	0.176	78.025	52.908	414.324
	30	21	4	1	894.976	798.926	571.26	0.895	0.715	0.511	13.208	12.693	19.051	41.366	23.346	71.224	3.312	0.469	656.093	0.265	519.035	7.26	0.046	1.379	1.028	0.216	0.095	0.015	0.005	0.022	4.769	715.02	469.12	0.246	86.02	57.65	325.449
	30	28	3	1	893.24	776.103	540.15	0.893	0.693	0.483	14.153	13.445	23.368	50.99	24.255	87.297	3.521	0.486	700.713	0.275	569.977	7.09	0.038	1.455	1.073	0.24	0.102	0.012	0.006	0.021	4.466	693.316	485.816	0.207	91.256	60.492	334.067
	30	28	4	1	905.989	787.096	552.91	0.906	0.713	0.501	14.619	12.811	18.926	48.36	25.041	81.579	2.766	0.47	659.162	0.258	514.8	7.26	0.047	1.47	1.122	0.225	0.087	0.014	0.004	0.019	4.994	713.243	470.143	0.243	91.619	61.408	317.116
	30	35	3	1	861.623	795.208	610.18	0.862	0.686	0.526	13.327	13.955	24.528	51.117	26.051	91.156	3.592	0.421	614.633	0.262	497.776	7.26	0.035	1.447	1.066	0.239	0.108	0.012	0.003	0.018	4.459	685.581	421.381	0.264	91.28	60.703	269.398
	30	35	4	1	897.582	792.339	570.29	0.898	0.711	0.512	10.943	9.993	14.742	38.205	25.362	61.245	2.974	0.386	542.077	0.186	363.78	7.19	0.034	1.432	1.08	0.216	0.096	0.012	0.006	0.021	4.996	711.474	385.674	0.326	89.38	60.335	235.958
	30	42	3	1	890.894	815.005	606.27	0.891	0.727	0.54	13.676	11.308	19.51	42.741	26.951	76.223	5.278	0.341	469.387	0.155	286.701	7.14	0.028	1.375	1.012	0.229	0.107	0.01	0.002	0.015	4.411	726.519	341.019	0.385	87.182	58.009	195.828
	30	42	4	1	875.94	811.704	614.01	0.876	0.711	0.538	13.796	12.759	19.928	42.619	24.592	75.004	4.852	0.348	489.94	0.175	325.715	7.2	0.027	1.422	1.045	0.24	0.107	0.01	0.002	0.017	4.353	711.288	348.488	0.363	89.974	59.589	198.925
	40	21	3	1	886.279	790.89	526.94	0.887	0.701	0.467	13.293	13.468	18.724	44.282	28.186	80.075	4.883	0.447	637.209	0.213	455.483	7.16	0.043	1.437	1.052	0.247	0.103	0.014	0.003	0.019	4.262	701.23	446.83	0.254	90.493	59.491	296.845
	40	21	4	1	907.132	790.757	534.3	0.908	0.718	0.485	12.385	11.273	20.172	42.313	26.248	74.628	4.339	0.503	700.235	0.27	556.351	7.26	0.047	1.426	1.056	0.23	0.097	0.015	0.005	0.023	4.601	717.895	502.695	0.215	88.985	59.214	354.496
	40	28	3	1	901.569	792.69	526.38	0.902	0.715	0.475	12.694	11.835	19.826	48.072	25.497	79.741	5.281	0.434	606.686	0.194	407.698	7.26	0.04	1.447	1.054	0.25	0.106	0.012	0.003	0.02	4.213	714.951	433.751	0.281	91.225	59.943	282.582
	40	28	4	1	912.524	796.167	490.08	0.913	0.727	0.447	13.418	9.952	20.688	51.012	24.999	81.597	3.146	0.518	712.965	0.239	533.692	7.32	0.045	1.519	1.114	0.255	0.109	0.016	0.005	0.02	4.374	726.739	518.139	0.209	95.352	63.035	359.753
	40	35	3	1	915.445	784.415	541.56	0.916	0.719	0.496	12.627	11.516	20.405	43.204	21.174	69.536	2.841	0.495	688.48	0.272	548.784	7.34	0.029	1.446	1.067	0.239	0.102	0.012	0.005	0.022	4.461	718.735	494.835	0.224	90.763	60.164	343.908
	40	35	4	1	910.62	810.906	602.17	0.911	0.739	0.549	14.357	10.783	18.264	43.344	24.83	72.661	3.938	0.412	556.889	0.221	403.289	7.34	0.037	1.485	1.107	0.237	0.111	0.011	0.002	0.017	4.673	739.092	411.592	0.327	93.788	62.901	254.903
	40	42	3	1	915.687	806.494	582.81	0.916	0.739	0.534	13.035	12.037	19.606	40.625	24.679	71.898	5.915	0.333	450.886	0.128	240.134	7.34	0.028	1.448	1.061	0.25	0.111	0.01	0.002	0.015	4.242	738.644	333.044	0.406	91.977	60.65	180.417
	40	42	4	1	913.851	818.724	541.89	0.914	0.749	0.495	14.832	11.057	20.084	45.175	21.808	74.432	3.713	0.379	506.122	0.126	253.816	7.06	0.033	1.414	1.042	0.241	0.104	0.01	0.002	0.016	4.322	748.566	378.866	0.37	89.546	59.112	230.208
	30	21	3	1	900.531	801.146	499.31	0.901	0.722	0.45	18.196	9.853	22.197	38.775	26.454	79.894	5.689	0.497	688.332	0.225	499.927	7.29	0.038	1.426	1.058	0.213	0.108	0.015	0.008	0.024	4.955	721.601	496.701	0.225	88.861	60.35	347.491
	30	21	4	1	894.976	798.926	571.26	0.896	0.716	0.512	17.49	10.365	23.242	40.217	25.646	81.297	5.043	0.483	674.395	0.279	544.631	7.3	0.044	1.416	1.05	0.218	0.104	0.015	0.006	0.022	4.81	715.592	482.592	0.233	88.402	59.59	334.6
	30	28	3	1	893.24	776.103	540.15	0.893	0.693	0.483	16.987	12.114	28.682	45.935	24.075	92.055	5.761	0.507	730.885	0.296	613.328	7.24	0.037	1.442	1.062	0.229	0.112	0.012	0.005	0.022	4.629	693.385	506.785	0.187	90.591	60.831	355.362
	30	28	4	1	905.989	787.096	552.91	0.906	0.713	0.501	15.993	10.396	19.092	47.742	38.81	98.611	3.447	0.465	651.696	0.253	504.171	7.26	0.047	1.501	1.137	0.225	0.102	0.014	0.004	0.019	5.062	713.457	464.957	0.249	93.911	63.557	307.489
	30	35	3	1	861.623	795.208	610.18	0.862	0.686	0.526	18.877	13.055	29.179	54.327	30.523	112.644	7.746	NA	NA	NA	NA	7.07	0.032	1.435	1.054	0.229	0.12	0.012	0.002	0.019	4.6	685.786	NA	NA	90.833	61.202	NA
	30	35	4	1	897.582	792.339	570.29	0.898	0.712	0.512	15.339	8.78	16.374	42.069	24.832	72.683	3.052	0.379	532.753	0.18	350.825	7.22	0.036	1.408	1.068	0.205	0.1	0.01	0.005	0.021	5.22	711.829	379.229	0.333	88.083	60.094	231.053
	30	42	3	1	890.894	815.005	606.27	0.892	0.727	0.541	16.038	12.488	25.506	43.911	22.547	86.344	5.788	0.335	461.29	0.149	275.816	7.09	0.029	1.431	1.056	0.232	0.118	0.009	0.001	0.015	4.558	726.737	335.237	0.392	90.991	61.138	183.107
	30	42	4	1	875.94	811.704	614.01	0.876	0.711	0.538	16.129	12.761	23.039	44.524	22.089	83.833	5.09	0.349	491.014	0.176	327.134	7.26	0.03	1.59	1.156	0.271	0.132	0.012	0.002	0.018	4.262	711.217	349.217	0.362	101.118	67.117	180.982
	40	21	3	1	886.279	790.89	526.94	0.887	0.701	0.467	14.868	11.277	20.474	45.416	31.95	91.485	5.567	0.482	687.58	0.248	531.086	7.26	0.034	1.525	1.112	0.257	0.12	0.014	0.003	0.019	4.321	701.3	482.2	0.219	96.36	63.906	321.934
	40	21	4	1	907.132	790.757	534.3	0.907	0.717	0.485	12.395	10.768	18.047	43.803	28.496	80.243	3.673	0.531	740.144	0.298	615.417	7.26	0.044	1.477	1.097	0.233	0.105	0.015	0.004	0.022	4.709	717.321	530.921	0.186	92.417	61.933	376.571
	40	28	3	1	901.569	792.69	526.38	0.902	0.715	0.475	15.355	29.701	23.516	52.272	26.437	113.336	7.03	0.463	647.878	0.223	469.73	7.04	0.033	1.409	1.037	0.232	0.107	0.011	0.002	0.018	4.463	715.094	463.294	0.252	88.979	59.258	315.057
	40	28	4	1	912.524	796.167	490.08	0.913	0.727	0.448	0.062	13.579	20.591	48.193	26.842	74.612	5.458	0.487	670.231	0.208	464.268	7.35	0.043	1.343	0.999	0.209	0.101	0.013	0.004	0.018	4.781	727.175	487.375	0.24	84.332	56.839	346.205
	40	35	3	1	915.445	784.415	541.56	0.916	0.719	0.496	13.315	12.716	19.727	42.96	24.686	78.681	4.138	0.467	650.253	0.245	493.414	7.21	0.032	1.267	0.947	0.195	0.094	0.01	0.003	0.018	4.855	718.52	467.22	0.251	79.563	53.732	333.924
	40	35	4	1	910.62	810.906	602.17	0.911	0.739	0.549	15.439	13.694	17.351	49.749	26.911	89.131	4.667	0.44	595.544	0.25	455.344	7.12	0.033	1.301	0.978	0.195	0.102	0.009	0.002	0.016	5.018	739.018	440.118	0.299	82.104	55.936	302.078
	40	42	3	1	915.687	806.494	582.81	0.916	0.739	0.534	15.028	13.947	19.602	43.777	26.254	84.347	2.858	0.361	488.218	0.156	291.795	7.13	0.028	1.306	0.972	0.206	0.104	0.009	0.003	0.013	4.724	738.791	360.691	0.378	82.78	55.867	222.044
	40	42	4	1	913.851	818.724	541.89	0.914	0.748	0.495	14.013	10.402	8.924	33.689	22.302	54.881	2.547	0.368	492.045	0.115	232.547	7.21	0.033	1.185	0.887	0.185	0.089	0.008	0.003	0.013	4.785	748.491	368.291	0.38	74.839	50.448	243.004
	30	21	3	1	900.531	801.146	499.31	0.901	0.722	0.45	12.823	6.358	13.504	28.539	36.644	73.734	3.909	0.456	632.049	0.184	409.62	7.12	0.04	1.327	1.062	0.156	0.076	0.01	0.005	0.017	6.802	722.106	456.406	0.266	81.997	57.664	316.745
	30	21	4	1	894.976	798.926	571.26	0.895	0.715	0.511	13.035	4.96	9.942	18.854	29.444	51.391	2.034	0.382	534.605	0.179	349.129	7.26	0.04	1.259	1.009	0.151	0.068	0.009	0.005	0.016	6.689	715.091	382.291	0.333	77.789	54.464	250.038
	30	28	3	1	893.24	776.103	540.15	0.894	0.694	0.483	13.171	6.352	12.462	21.648	30.35	58.168	2.828	0.462	665.288	0.251	519.077	7.13	0.034	1.305	1.051	0.155	0.07	0.008	0.005	0.016	6.765	693.732	461.532	0.232	80.785	56.627	324.119
	30	28	4	1	905.989	787.096	552.91	0.906	0.713	0.501	11.863	6.609	12.983	30.875	30.037	66.59	1.542	0.401	562.561	0.189	377.283	7.25	0.039	1.325	1.087	0.158	0.057	0.009	0.003	0.013	6.894	713.243	401.243	0.312	81.918	57.099	262.225
	30	35	3	1	861.623	795.208	610.18	0.862	0.686	0.526	12.069	8.665	16.638	33.903	34.733	80.696	4.186	0.392	571.003	0.232	440.916	7.22	0.028	1.167	0.934	0.144	0.067	0.007	0.002	0.012	6.488	685.786	391.586	0.294	72.705	50.791	268.091
	30	35	4	1	897.582	792.339	570.29	0.898	0.712	0.512	11.114	6.366	11.805	26.891	24.669	55.858	2.015	0.383	538.328	0.184	358.571	7.26	0.036	1.245	1.012	0.142	0.063	0.007	0.005	0.016	7.13	711.545	383.045	0.329	76.786	54.087	252.172
	30	42	3	1	890.894	815.005	606.27	0.892	0.727	0.541	12.235	9.53	16.884	38.924	28.803	80.761	3.536	0.334	458.951	0.147	272.671	7.18	0.02	1.057	0.855	0.125	0.065	0.005	0	0.007	6.835	726.737	333.537	0.393	66.297	46.77	220.469
	30	42	4	1	875.94	811.704	614.01	0.877	0.712	0.538	13.962	9.904	16.638	33.62	21.99	69.398	2.087	0.304	427.101	0.131	242.644	7.12	0.03	1.056	0.849	0.128	0.064	0.005	0.001	0.009	6.607	711.644	303.944	0.408	66.118	46.403	191.423
	40	21	3	1	886.279	790.89	526.94	0.886	0.701	0.467	13.912	5.761	12.071	27.122	33.456	68.559	3.148	0.413	589.271	0.179	383.533	7.16	0.029	1.053	0.85	0.126	0.057	0.007	0.003	0.01	6.722	700.949	413.049	0.288	65.427	45.83	301.792
	40	21	4	1	907.132	790.757	534.3	0.908	0.718	0.485	16.494	5.797	10.589	23.404	35.921	67.681	2.6	0.425	592.518	0.193	396.932	7.22	0.042	1.035	0.846	0.114	0.052	0.008	0.003	0.012	7.411	717.823	425.323	0.292	63.796	45.164	316.363
	40	28	3	1	901.569	792.69	526.38	0.902	0.715	0.475	11.574	7.794	13.377	30.105	30.385	68.648	3.131	0.435	608.342	0.195	410.192	7.05	0.033	0.989	0.796	0.12	0.055	0.006	0.002	0.01	6.647	715.165	435.065	0.28	61.474	43.025	330.566
	40	28	4	1	912.524	796.167	490.08	0.913	0.727	0.447	11.639	18.738	15.104	37.222	28.033	86.135	3.534	0.481	661.053	0.201	449.359	7.12	0.036	1.108	0.886	0.14	0.06	0.009	0.003	0.011	6.345	726.957	480.557	0.246	68.871	47.837	363.85
	40	35	3	1	915.445	784.415	541.56	0.916	0.718	0.496	0.063	8.272	12.206	21.932	29.822	46.825	2.587	0.441	613.294	0.218	439.882	7.2	0.035	1.195	0.953	0.146	0.072	0.007	0.002	0.015	6.526	718.376	440.576	0.278	74.357	52.087	314.132
	40	35	4	1	910.62	810.906	602.17	0.911	0.739	0.549	12.614	9.289	12.365	24.647	29.823	62.21	2.663	0.369	499.421	0.179	325.9	7.01	0.034	1.234	0.993	0.148	0.074	0.006	0.002	0.011	6.688	738.944	369.044	0.37	77.106	54.19	237.749
	40	42	3	1	915.687	806.494	582.81	0.916	0.739	0.534	12.033	9.622	16.605	33.792	21.427	66.451	2.261	0.299	404.822	0.094	176.392	7.16	0.022	1.134	0.905	0.142	0.072	0.005	0	0.009	6.353	738.939	299.139	0.44	71.287	49.864	177.988
	40	42	4	1	913.851	818.724	541.89	0.915	0.749	0.496	12.365	9.904	17.123	31.293	23.44	66.23	2.938	0.368	490.963	0.114	230.913	7.06	0.027	1.2	0.966	0.149	0.071	0.005	0	0.009	6.471	748.865	367.665	0.381	75.294	52.614	239.757
	30	21	3	1	900.531	801.146	499.31	0.901	0.722	0.45	15.213	9.51	14.958	38.597	27.555	75.569	3.852	0.535	740.629	0.263	583.837	6.89	0.045	1.453	1.058	0.233	0.107	0.019	0.007	0.028	4.534	721.745	534.545	0.187	90.228	60.2	384.118
	30	21	4	1	894.976	798.926	571.26	0.895	0.715	0.511	16.301	4.96	13.38	31.829	31.079	67.703	3.181	0.575	804.341	0.371	726.364	6.95	0.046	1.354	0.994	0.207	0.101	0.018	0.008	0.026	4.801	715.02	575.12	0.14	83.92	56.639	434.561
	30	28	3	1	893.24	776.103	540.15	0.893	0.693	0.483	15.747	9.988	17.962	37.961	25.049	77.297	3.537	0.521	751.653	0.31	643.168	6.82	0.042	1.453	1.055	0.251	0.103	0.014	0.005	0.025	4.199	693.385	521.185	0.172	91.001	59.627	370.556
	30	28	4	1	905.989	787.096	552.91	0.906	0.713	0.501	15.648	10.396	14.701	29.402	25.809	65.783	1.738	0.476	666.553	0.263	525.321	6.85	0.045	1.451	1.079	0.235	0.093	0.017	0.004	0.023	4.586	713.457	475.557	0.238	90.415	59.927	325.215
	30	35	3	1	861.623	795.208	610.18	0.862	0.686	0.526	23.535	11.801	18.25	42.502	29.537	95.865	4.835	0.503	732.861	0.343	651.856	6.76	0.033	1.545	1.11	0.269	0.124	0.016	0.003	0.024	4.129	685.786	502.586	0.183	97.483	64.184	340.919
	30	35	4	1	897.582	792.339	570.29	0.898	0.712	0.512	15.684	10.42	14.907	33.957	27.421	71.285	3.27	0.498	699.647	0.299	582.701	6.8	0.045	1.624	1.18	0.278	0.115	0.017	0.006	0.029	4.247	711.829	498.029	0.214	101.532	66.695	329.802
	30	42	3	1	890.894	815.005	606.27	0.892	0.727	0.541	15.534	11.899	19.001	37.325	22.045	74.303	3.386	0.427	588.214	0.241	446.439	6.75	0.027	1.447	1.041	0.26	0.113	0.012	0.002	0.019	4.011	726.591	427.391	0.299	91.769	59.956	275.666
	30	42	4	1	875.94	811.704	614.01	0.877	0.712	0.538	17.932	15.429	23.63	39.318	24.234	88.837	5.498	0.431	605.421	0.258	478.377	6.78	0.039	1.478	1.056	0.271	0.114	0.013	0.002	0.021	3.894	711.644	430.844	0.281	93.544	60.683	276.617
	40	21	3	1	886.279	790.89	526.94	0.887	0.701	0.467	12.504	10.577	18.724	43.231	30.026	85.116	2.359	0.568	810.476	0.334	715.541	6.69	0.046	1.452	1.037	0.258	0.111	0.017	0.005	0.022	4.014	701.23	568.33	0.133	91.266	59.583	417.48
	40	21	4	1	907.132	790.757	534.3	0.908	0.718	0.485	12.384	9.646	17.176	37.089	25.646	71.461	3.346	0.579	807.094	0.347	714.502	6.83	0.05	1.45	1.048	0.243	0.106	0.02	0.006	0.027	4.318	717.967	579.467	0.138	90.271	59.626	429.57
	40	28	3	1	901.569	792.69	526.38	0.902	0.715	0.475	13.89	11.829	17.154	40.233	27.975	80.886	5.099	0.515	719.981	0.275	578.311	6.82	0.044	1.557	1.105	0.284	0.12	0.016	0.006	0.025	3.887	715.308	515.008	0.2	97.998	63.566	353.443
	40	28	4	1	912.524	796.167	490.08	0.913	0.727	0.447	16.968	12.065	17.898	42.221	27.873	86.453	4.319	0.566	779.288	0.287	641.439	6.8	0.044	1.574	1.121	0.283	0.119	0.019	0.006	0.025	3.967	726.739	566.339	0.16	98.8	64.302	403.238
	40	35	3	1	915.445	784.415	541.56	0.916	0.719	0.496	11.943	10.832	18.268	35.853	22.286	68.951	2.702	0.487	676.932	0.264	532.057	6.84	0.042	1.384	1.002	0.242	0.1	0.014	0.004	0.023	4.135	718.735	486.535	0.232	86.904	56.835	342.796
	40	35	4	1	910.62	810.906	602.17	0.911	0.739	0.549	12.614	12.116	16.937	39.861	24.918	75.582	3.793	0.473	639.756	0.283	514.881	6.74	0.034	1.533	1.107	0.268	0.121	0.014	0.003	0.021	4.135	738.944	472.744	0.266	96.977	63.782	311.985
	40	42	3	1	915.687	806.494	582.81	0.916	0.738	0.534	12.788	12.123	16.864	34.062	25.1	70.494	4.315	0.392	530.262	0.187	349.975	6.65	0.034	1.525	1.09	0.281	0.12	0.013	0.001	0.019	3.884	738.496	391.596	0.347	96.804	62.832	231.96
	40	42	4	1	913.851	818.724	541.89	0.915	0.749	0.496	12.859	12.859	16.14	36.711	20.981	68.836	2.025	0.4	534.182	0.147	296.211	6.6	0.035	1.513	1.085	0.274	0.116	0.013	0.003	0.021	3.957	748.79	399.99	0.349	95.712	62.275	242.003
	30	21	3	1	900.531	801.146	499.31	0.901	0.722	0.45	9.336	7.72	14.441	34.498	27.289	67.51	2.517	0.571	790.453	0.299	663.781	7.23	0.049	1.329	0.975	0.202	0.101	0.018	0.007	0.025	4.839	722.034	570.734	0.151	82.414	55.775	432.545
	30	21	4	1	894.976	798.926	571.26	0.896	0.716	0.512	11.567	4.699	10.536	23.133	22.383	45.502	1.55	0.531	742.73	0.328	640.2	7.1	0.048	1.35	0.985	0.21	0.104	0.019	0.006	0.025	4.684	715.592	531.492	0.184	83.927	56.498	391.067
	30	28	3	1	893.24	776.103	540.15	0.894	0.694	0.483	12.111	7.771	17.071	37.153	29.116	78.047	2.924	0.581	837.513	0.37	766.534	6.93	0.043	1.456	1.052	0.251	0.109	0.016	0.004	0.024	4.198	693.593	580.893	0.113	91.366	60.099	429.428
	30	28	4	1	905.989	787.096	552.91	0.906	0.713	0.501	10.573	7.558	11.176	28.814	31.679	64.129	1.377	0.433	606.507	0.22	439.842	6.96	0.046	1.505	1.11	0.238	0.111	0.017	0.007	0.022	4.668	713.1	432.5	0.281	94.089	63.099	275.312
	30	35	3	1	861.623	795.208	610.18	0.862	0.685	0.526	10.554	7.058	14.229	32.403	27.855	66.223	2.456	0.48	700.28	0.32	609.395	6.96	0.035	1.354	0.985	0.22	0.111	0.013	0.004	0.021	4.469	685.307	479.907	0.205	85.222	57.067	337.618
	30	35	4	1	897.582	792.339	570.29	0.898	0.712	0.512	9.301	5.675	10.596	24.905	24.237	48.199	1.393	0.513	721.451	0.314	612.995	6.88	0.036	1.443	1.058	0.229	0.11	0.015	0.006	0.025	4.618	711.545	513.345	0.198	90.188	60.487	362.67
	30	42	3	1	890.894	815.005	606.27	0.891	0.726	0.54	13.001	10.041	18.328	39.024	26.277	80.171	3.66	0.353	485.578	0.167	308.465	6.8	0.027	1.409	1.017	0.246	0.114	0.011	0.004	0.017	4.13	726.446	352.746	0.374	89.336	58.829	204.58
	30	42	4	1	875.94	811.704	614.01	0.876	0.711	0.538	10.864	7.062	14.147	34.515	25.293	64.85	2.661	0.382	536.993	0.209	387.917	6.91	0.03	1.336	0.958	0.236	0.112	0.012	0.001	0.017	4.067	711.004	381.804	0.329	84.824	55.835	241.145
	40	21	3	1	886.279	790.89	526.94	0.887	0.701	0.467	11.279	6.723	14.871	35.087	30.116	73.071	3.161	0.569	811.455	0.335	717.011	6.8	0.039	1.392	1.005	0.231	0.11	0.018	0.006	0.021	4.342	701.159	568.959	0.132	87.244	57.997	423.718
	40	21	4	1	907.132	790.757	534.3	0.908	0.718	0.485	9.56	6.138	11.272	31.87	28.213	61.411	2.03	0.589	820.047	0.356	733.672	6.82	0.046	1.416	1.031	0.228	0.105	0.02	0.006	0.026	4.521	717.967	588.767	0.129	88.091	58.766	441.91
	40	28	3	1	901.569	792.69	526.38	0.902	0.715	0.475	12.097	10.12	17.169	37.862	29.719	80.075	4.315	0.537	750.792	0.296	624.711	6.78	0.041	1.539	1.105	0.272	0.121	0.015	0.004	0.022	4.059	714.665	536.565	0.178	97.161	63.664	375.74
	40	28	4	1	912.524	796.167	490.08	0.913	0.727	0.447	10.963	7.161	16.034	36.715	28.963	74.936	2.748	0.556	764.773	0.276	617.858	6.8	0.042	1.583	1.125	0.277	0.128	0.021	0.006	0.025	4.058	726.957	555.957	0.171	99.439	65.333	391.186
	40	35	3	1	915.445	784.415	541.56	0.916	0.718	0.496	11.692	6.989	11.521	27.06	26.997	58.525	1.772	0.508	707.146	0.286	575.82	6.8	0.04	1.489	1.078	0.249	0.116	0.016	0.004	0.025	4.324	718.448	508.048	0.21	93.478	62.019	352.551
	40	35	4	1	910.62	810.906	602.17	0.911	0.739	0.549	12.117	8.375	13.946	33.712	27.831	69.606	1.945	0.423	572.185	0.233	423.887	6.76	0.033	1.485	1.075	0.253	0.123	0.014	0.002	0.019	4.253	738.87	422.77	0.316	94.088	62.433	266.249
	40	42	3	1	915.687	806.494	582.81	0.916	0.738	0.534	11.208	8.213	14.203	34.062	28.926	69.825	2.88	0.413	558.698	0.208	389.325	6.69	0.029	1.471	1.055	0.266	0.12	0.012	0.001	0.017	3.97	738.496	412.596	0.326	93.606	61.183	257.808
	40	42	4	1	913.851	818.724	541.89	0.914	0.749	0.495	11.878	7.446	16.145	38.528	26.978	75.569	2.431	0.436	582.802	0.183	369.669	6.78	0.032	1.49	1.067	0.264	0.125	0.013	0.002	0.019	4.045	748.566	436.266	0.312	94.614	62.242	279.409
	30	21	3	1	900.531	801.146	499.31	0.901	0.722	0.45	10.952	6.528	10.101	23.605	33.581	66.375	1.782	0.557	771.086	0.285	632.707	6.8	0.046	1.314	1.018	0.166	0.085	0.015	0.008	0.021	6.124	722.106	556.806	0.165	80.944	56.416	419.446
	30	21	4	1	894.976	798.926	571.26	0.895	0.715	0.511	11.056	5.474	8.995	26.835	32.784	66.605	2.173	0.57	796.87	0.366	715.916	6.76	0.039	1.461	1.122	0.192	0.1	0.016	0.007	0.024	5.842	715.306	570.006	0.145	90.396	62.714	416.895
	30	28	3	1	893.24	776.103	540.15	0.894	0.694	0.483	9.54	7.946	12.905	25.81	28.136	64.742	2.359	0.481	693.974	0.271	560.293	6.78	0.039	1.347	1.042	0.192	0.081	0.01	0.003	0.019	5.429	693.732	481.432	0.212	83.893	57.108	340.43
	30	28	4	1	905.989	787.096	552.91	0.906	0.713	0.501	13.498	8.503	13.068	29.063	26.158	69.803	1.035	0.521	730.413	0.309	616.229	6.76	0.032	1.508	1.165	0.221	0.085	0.015	0.002	0.021	5.263	713.314	521.014	0.192	93.815	63.325	363.874
	30	35	3	1	861.623	795.208	610.18	0.862	0.685	0.526	13.778	10.373	16.646	26.571	32.241	78.616	3.741	0.5	729.372	0.34	647.309	6.68	0.036	1.48	1.131	0.218	0.099	0.011	0.001	0.019	5.199	685.444	499.944	0.186	92.804	63.059	344.081
	30	35	4	1	897.582	792.339	570.29	0.898	0.712	0.512	12.146	7.313	10.592	29.642	29.147	68.458	2.09	0.516	724.513	0.316	617.248	6.76	0.034	1.514	1.167	0.219	0.087	0.012	0.005	0.024	5.333	711.829	515.729	0.196	94.003	63.685	358.042
	30	42	3	1	890.894	815.005	606.27	0.892	0.727	0.541	13.418	8.853	15.785	28.442	25.76	71.931	3.047	0.339	466.932	0.153	283.4	6.75	0.032	1.283	1.003	0.175	0.085	0.007	0.002	0.012	5.737	726.737	339.337	0.387	80.629	55.625	203.082
	30	42	4	1	875.94	811.704	614.01	0.877	0.712	0.538	13.098	9.991	13.53	32.067	27.428	73.577	2.922	0.406	570.853	0.233	432.679	6.74	0.036	1.503	1.139	0.233	0.104	0.01	0.002	0.016	4.889	711.644	406.244	0.305	94.769	63.779	247.697
	40	21	3	1	886.279	790.89	526.94	0.887	0.701	0.467	11.538	7.947	13.991	29.296	29.144	70.892	3.249	0.474	675.492	0.24	512.943	6.78	0.044	1.305	1.001	0.189	0.085	0.012	0.003	0.015	5.302	701.37	473.77	0.228	81.574	55.527	336.668
	40	21	4	1	907.132	790.757	534.3	0.908	0.718	0.485	12.897	6.138	8.876	24.426	30.096	61.198	2.262	0.588	818.376	0.355	731.199	6.79	0.045	1.332	1.035	0.173	0.085	0.014	0.005	0.02	5.979	717.967	587.567	0.13	82.451	57.199	447.916
	40	28	3	1	901.569	792.69	526.38	0.902	0.715	0.475	12.951	8.483	11.146	32.774	29.704	73.86	2.866	0.552	771.336	0.311	655.648	6.71	0.041	1.445	1.104	0.22	0.092	0.01	0.002	0.016	5.009	715.022	551.522	0.164	90.712	61.041	399.769
	40	28	4	1	912.524	796.167	490.08	0.913	0.727	0.447	11.302	7.837	15.951	35.282	25.923	74.953	2.719	0.516	709.445	0.236	527.974	6.8	0.032	1.4	1.063	0.213	0.09	0.013	0.003	0.017	5.003	726.885	515.685	0.211	87.549	58.965	369.172
	40	35	3	1	915.445	784.415	541.56	0.916	0.719	0.496	12.459	6.816	10.065	18.335	21.606	46.842	1.607	0.517	720.008	0.295	594.449	6.79	0.033	1.318	1.021	0.182	0.085	0.01	0.003	0.017	5.61	718.591	517.391	0.201	82.271	56.503	378.617
	40	35	4	1	910.62	810.906	602.17	0.911	0.739	0.549	15.446	8.377	11.87	27.981	26.922	67.947	2.436	0.495	670.242	0.305	555.934	6.69	0.032	1.385	1.071	0.195	0.092	0.01	0.002	0.016	5.503	738.723	495.123	0.244	86.847	59.539	348.737
	40	42	3	1	915.687	806.494	582.81	0.916	0.739	0.534	13.199	7.711	11.453	26.232	27.085	62.366	2.535	0.442	598.804	0.237	444.824	6.65	0.027	1.347	1.045	0.193	0.089	0.007	0.001	0.011	5.403	738.791	442.391	0.296	84.982	58.065	299.345
	40	42	4	1	913.851	818.724	541.89	0.914	0.748	0.495	13.033	8.271	12.13	27.709	23.625	60.712	2.139	0.428	571.768	0.175	352.997	6.74	0.032	1.336	1.029	0.191	0.093	0.008	0.001	0.013	5.378	748.192	427.792	0.32	84.127	57.577	286.087
	30	21	1	2	918.82	805.17	571.81	0.92	0.741	0.526	22.791	15.905	26.192	41.621	44.857	100.589	4.666	0.366	494.562	0.152	288.289	6.66	0.043	2.147	1.456	0.399	0.206	0.02	0.027	0.04	3.65	740.546	366.246	0.374	135.09	88.073	143.084
	30	21	2	2	919.46	809.24	522.42	0.92	0.744	0.48	23.336	4.765	25.4	40.257	45.457	88.004	3.207	0.364	489.713	0.101	209.554	6.65	0.038	2.133	1.397	0.444	0.207	0.019	0.028	0.038	3.148	744.287	364.487	0.38	135.007	85.301	144.18
	30	21	3	2	916.55	801.17	485.97	0.917	0.735	0.446	27.075	14.697	31.508	48.904	45.14	117.085	5.608	0.396	538.754	0.107	239.591	6.62	0.039	2.246	1.492	0.457	0.222	0.023	0.012	0.04	3.265	734.533	395.733	0.339	142.999	91.193	161.54
	30	21	4	2	913.81	794.71	507.98	0.915	0.727	0.465	23.13	11.976	26.848	38.425	43.326	92.84	3.253	0.396	544.85	0.134	287.94	6.7	0.038	2.065	1.375	0.405	0.203	0.023	0.016	0.043	3.392	727.013	396.113	0.331	130.504	83.956	181.653
	30	28	1	2	922.51	798.42	571.27	0.923	0.737	0.527	21.227	10.061	24.06	36.393	42.559	83.377	3.406	0.311	421.47	0.101	191.433	6.64	0.029	2.043	1.376	0.387	0.209	0.016	0.02	0.036	3.555	737.213	310.713	0.427	129.695	84.547	96.471
	30	28	2	2	919.74	796.48	592.56	0.92	0.733	0.545	23.54	12.22	22.953	42.155	40.059	90.197	4.692	0.313	427.813	0.126	230.904	6.65	0.035	1.922	1.334	0.33	0.197	0.015	0.01	0.036	4.041	732.628	313.428	0.419	121.911	81.565	109.951
	30	28	3	2	919.02	787.32	572.87	0.919	0.724	0.527	22.809	13.558	27.308	43.265	41.397	97.15	4.445	0.395	545.718	0.198	375.661	6.68	0.036	1.988	1.341	0.372	0.212	0.017	0.009	0.038	3.606	723.78	394.98	0.329	126.774	83.226	184.98
	30	28	4	2	926.79	789.6	558.85	0.927	0.732	0.518	22.383	10.66	24.229	42.102	42.438	90.665	3.76	0.356	486.536	0.142	274.526	6.68	0.037	2.166	1.486	0.405	0.192	0.022	0.023	0.037	3.666	732.086	356.186	0.376	136.235	88.301	131.65
	30	35	1	2	927.54	815.11	576.95	0.928	0.756	0.535	22.725	11.839	24.35	39.46	42.791	89.812	3.385	0.304	401.612	0.083	154.603	6.59	0.027	1.936	1.298	0.38	0.211	0.015	0	0.032	3.412	756.198	303.698	0.453	124.724	81.025	97.949
	30	35	2	2	930.26	809.7	531.79	0.931	0.754	0.495	22.133	11.463	21.726	41.193	46.243	91.416	3.464	0.304	402.952	0.045	90.939	6.6	0.028	1.913	1.296	0.347	0.216	0.015	0.006	0.033	3.735	754.211	303.911	0.45	122.517	81.42	99.973
	30	35	3	2	934.01	818.23	611.46	0.935	0.765	0.572	23.193	13.393	28.013	43.596	43.355	100.478	4.35	0.342	447.285	0.149	260.38	6.58	0.033	2.028	1.347	0.409	0.22	0.014	0.003	0.035	3.294	764.77	342.07	0.423	130.551	84.138	127.381
	30	35	4	2	931.92	807.77	590.21	0.932	0.753	0.55	22.164	10.337	22.817	36.683	42.801	83.139	3.723	0.352	467.837	0.15	271.675	6.64	0.031	2.12	1.436	0.408	0.204	0.015	0.021	0.034	3.516	753.153	352.353	0.401	134.522	87.001	130.831
	30	42	1	2	922.05	807.1	613.65	0.923	0.745	0.566	22.168	11.774	21.673	36.852	42.131	82.314	3.701	0.291	390.768	0.113	198.71	6.59	0.031	1.917	1.312	0.341	0.209	0.014	0.009	0.032	3.843	744.707	291.007	0.454	122.45	81.547	87.011
	30	42	2	2	921.5	798.16	649.68	0.922	0.736	0.599	23.177	10.993	23.427	41.452	44.372	91.501	4.94	0.319	433.009	0.182	303.427	6.6	0.037	1.956	1.293	0.386	0.207	0.015	0.02	0.034	3.346	736.166	318.766	0.417	124.493	80.389	113.885
	30	42	3	2	914.04	794.13	591.45	0.914	0.726	0.541	22.231	12.247	22.993	37.208	44.401	87.036	4.006	0.293	403.729	0.108	199.396	6.64	0.034	2	1.361	0.36	0.205	0.015	0.025	0.034	3.783	726.012	293.112	0.433	126.444	83.523	83.145
	30	42	4	2	921.52	780.22	634.14	0.922	0.719	0.585	23.887	11.42	25.765	41.05	38.916	89.192	4.197	0.303	420.922	0.168	287.526	6.66	0.034	2.049	1.416	0.355	0.2	0.016	0.024	0.039	3.983	719.42	302.82	0.417	128.956	85.696	88.167
	40	21	1	2	906.91	804.89	566.16	0.907	0.73	0.514	27.405	19.412	32.285	44.315	40.193	112.726	6.982	0.385	527.378	0.169	328.09	6.66	0.046	2.145	1.4	0.433	0.215	0.022	0.028	0.046	3.236	730.182	385.082	0.345	135.141	86.247	163.694
	40	21	2	2	909.76	809.52	619.53	0.91	0.737	0.564	28.319	20.067	29.319	42.073	43.906	112.761	7.843	0.362	490.898	0.189	334.773	6.58	0.033	2.154	1.386	0.45	0.224	0.019	0.032	0.043	3.078	736.984	361.784	0.375	136.277	86.262	139.246
	40	21	3	2	910.5	815.42	556.06	0.912	0.743	0.507	29.072	20.806	30.394	39.486	41.222	110.601	6.652	0.37	497.885	0.134	263.687	6.57	0.036	2.241	1.476	0.455	0.214	0.024	0.025	0.048	3.246	743.257	370.057	0.373	141.2	89.732	139.124
	40	21	4	2	914.56	798.76	540.15	0.916	0.731	0.495	26.52	18.624	35.507	45.586	43.318	118.664	7.415	0.44	602.128	0.204	411.637	6.62	0.046	2.096	1.409	0.394	0.218	0.016	0.019	0.039	3.572	731.391	440.391	0.291	133.024	86.969	220.397
	40	28	1	2	922.1	800.24	618.62	0.923	0.738	0.571	25.35	17.53	30.341	42.902	39.242	104.35	6.349	0.33	447.116	0.163	284.796	6.55	0.037	2.113	1.41	0.402	0.214	0.017	0.031	0.039	3.508	738.492	330.192	0.408	133.314	86.65	110.227
	40	28	2	2	922.32	796.75	565.67	0.923	0.735	0.522	24.288	17.437	28.882	41.664	40.076	101.601	5.188	0.351	477.816	0.138	264.5	6.6	0.037	2.254	1.508	0.436	0.223	0.021	0.024	0.042	3.455	735.373	351.373	0.384	142.521	92.091	116.762
	40	28	3	2	924.49	792.05	564.93	0.925	0.733	0.523	22.618	18.006	32.178	48.11	39.473	109.236	6.223	0.382	521.573	0.172	329.229	6.62	0.038	2.268	1.509	0.441	0.223	0.021	0.033	0.041	3.422	732.608	382.108	0.35	142.975	92.17	146.963
	40	28	4	2	925.02	780.68	512.41	0.926	0.723	0.474	24.205	14.684	28.456	45.712	40.102	102.489	5.777	0.431	597.039	0.183	386.07	6.6	0.045	2.191	1.45	0.452	0.198	0.024	0.027	0.04	3.211	722.65	431.45	0.291	137.988	87.009	206.453
	40	35	1	2	931.93	809.54	541.99	0.933	0.756	0.506	23.638	17.215	28.517	43.233	44.615	106.195	6.282	0.368	486.875	0.118	233.574	6.54	0.032	2.12	1.388	0.436	0.223	0.017	0.019	0.037	3.183	755.566	367.866	0.388	135.326	86.357	146.184
	40	35	2	2	929.53	816.97	514.41	0.93	0.76	0.478	21.078	15.257	27.302	43.874	42.096	98.074	5.43	0.349	458.897	0.067	140.638	6.51	0.031	2.125	1.39	0.436	0.225	0.016	0.021	0.036	3.186	759.93	348.73	0.411	135.612	86.623	126.495
	40	35	3	2	931.79	809.5	537.14	0.933	0.755	0.501	20.811	16.091	30.414	46.283	36.436	98.364	4.888	0.339	449.454	0.085	170.297	6.53	0.03	2.156	1.415	0.444	0.226	0.016	0.018	0.036	3.187	754.887	339.287	0.416	137.833	87.946	113.508
	40	35	4	2	931.49	791	512.81	0.932	0.737	0.478	19.736	14.4	29.24	45.246	36.66	93.86	5.289	0.331	448.623	0.071	149.511	6.64	0.036	2.129	1.439	0.418	0.2	0.016	0.018	0.038	3.438	736.882	330.582	0.406	135.052	86.724	108.806
	40	42	1	2	923.51	793.8	610.17	0.924	0.733	0.564	18.909	14.972	30.971	45.463	35.662	94.572	4.942	0.319	435.623	0.15	265.775	6.64	0.04	2.072	1.404	0.369	0.208	0.017	0.034	0.04	3.803	733.375	319.475	0.414	130.009	85.885	103.581
	40	42	2	2	926.71	793	606.84	0.927	0.735	0.562	23.881	16.108	29.314	42.268	38.089	98.665	6.375	0.297	403.696	0.124	220.768	6.62	0.047	2.043	1.39	0.358	0.212	0.016	0.028	0.038	3.88	735.028	296.728	0.438	128.681	85.57	82.477
	40	42	3	2	924.01	800.45	499.89	0.925	0.741	0.463	23.453	14.743	32.08	47.177	36.393	102.655	6.406	0.334	450.435	0.056	120.007	6.58	0.035	2.086	1.414	0.368	0.216	0.016	0.033	0.038	3.844	740.585	333.585	0.407	131.233	87.113	115.239
	40	42	4	2	924.75	785.57	591.06	0.925	0.726	0.547	19.935	14.1	30.59	45.896	35.072	94.053	4.231	0.34	467.552	0.16	292.33	6.64	0.044	2.142	1.495	0.357	0.196	0.017	0.037	0.041	4.189	726.456	339.656	0.387	133.408	89.088	117.16
	30	21	1	2	918.82	805.17	571.81	0.919	0.74	0.525	27.38	19.409	38.009	50.88	47.393	116.926	5.721	0.381	515.549	0.167	317.841	6.46	0.055	2.429	1.583	0.515	0.251	0.024	0.017	0.04	3.073	739.806	381.406	0.358	155.31	98.112	127.985
	30	21	2	2	919.46	809.24	522.42	0.92	0.744	0.48	25.812	18.962	35.965	46.364	47.272	108.037	6.076	0.381	512.151	0.117	244.311	6.45	0.047	2.349	1.523	0.49	0.256	0.024	0.019	0.039	3.11	744.287	381.187	0.363	150.267	95.741	135.179
	30	21	3	2	916.55	801.17	485.97	0.917	0.735	0.446	26.312	18.119	35.09	46.042	49.804	109.254	10.173	0.366	498.385	0.077	173.038	6.48	0.053	2.441	1.566	0.535	0.255	0.025	0.021	0.039	2.926	734.826	366.226	0.369	156.169	97.654	112.402
	30	21	4	2	913.81	794.71	507.98	0.914	0.726	0.464	27.129	18.501	38.463	52.419	52.419	122.96	7.014	0.448	617.093	0.186	400.961	6.5	0.053	2.45	1.602	0.508	0.257	0.028	0.012	0.044	3.155	726.287	448.187	0.278	156.4	99.553	192.233
	30	28	1	2	922.51	798.42	571.27	0.924	0.737	0.528	28.638	19.223	33.137	47.3	49.799	111.801	6.92	0.324	438.945	0.114	215.856	6.46	0.043	2.352	1.563	0.473	0.253	0.018	0.011	0.034	3.306	737.361	323.661	0.414	151.17	97.438	75.052
	30	28	2	2	919.74	796.48	592.56	0.92	0.733	0.545	25.047	17.92	36.869	51.96	45.085	110.363	7.254	0.33	449.98	0.142	260.7	6.46	0.041	2.352	1.585	0.444	0.244	0.019	0.023	0.037	3.569	732.701	329.701	0.403	149.585	97.714	82.402
	30	28	3	2	919.02	787.32	572.87	0.919	0.724	0.527	24.002	18.654	35.803	47.263	44.207	103.295	5.374	0.348	481.092	0.151	286.842	6.48	0.038	2.281	1.522	0.449	0.247	0.02	0.006	0.036	3.39	723.635	348.135	0.375	146.45	94.995	106.69
	30	28	4	2	926.79	789.6	558.85	0.927	0.732	0.518	23.469	14.995	31.355	50.484	48.051	101.922	5.912	0.365	498.52	0.151	291.458	6.49	0.041	2.403	1.62	0.475	0.231	0.024	0.016	0.037	3.412	732.232	365.032	0.367	152.799	98.137	114.096
	30	35	1	2	927.54	815.11	576.95	0.928	0.756	0.535	24.68	19.398	34.999	48.568	47.268	108.505	4.924	0.305	403.873	0.084	157.797	6.4	0.032	2.327	1.5	0.511	0.258	0.018	0.007	0.032	2.936	756.047	305.347	0.451	150.667	94.805	59.876
	30	35	2	2	930.26	809.7	531.79	0.931	0.754	0.495	21.975	17.005	33.788	48.452	45.764	99.69	5.93	0.305	404.822	0.046	93.786	0	0.032	2.326	1.519	0.479	0.26	0.018	0.017	0.033	3.169	754.06	305.26	0.449	149.645	95.971	59.644
	30	35	3	2	934.01	818.23	611.46	0.935	0.765	0.572	17.651	17.651	35.724	47.773	44.801	96.499	4.934	0.351	458.792	0.158	275.778	6.46	0.033	2.279	1.45	0.53	0.244	0.017	0.009	0.029	2.735	764.77	350.87	0.414	147.788	91.016	112.065
	30	35	4	2	931.92	807.77	590.21	0.933	0.754	0.551	23.29	16.362	32.012	48.558	46.928	100.999	5.49	0.302	400.674	0.099	179.754	6.4	0.042	2.343	1.542	0.475	0.254	0.019	0.018	0.034	3.25	753.68	301.98	0.452	150.174	96.553	55.253
	30	42	1	2	922.05	807.1	613.65	0.923	0.745	0.566	24.226	16.72	31.236	46.906	45.752	98.499	4.524	0.339	455.331	0.161	283.627	6.49	0.038	2.334	1.545	0.463	0.255	0.019	0.016	0.036	3.339	744.856	339.156	0.406	149.57	96.815	92.771
	30	42	2	2	921.5	798.16	649.68	0.922	0.736	0.599	27.265	18.837	33.691	50.798	48.044	112.347	6.508	0.369	501.064	0.232	387.035	6.47	0.036	2.292	1.546	0.43	0.257	0.019	0.006	0.035	3.593	736.166	368.866	0.367	147.324	97.04	124.503
	30	42	3	2	914.04	794.13	591.45	0.914	0.726	0.541	25.79	17.412	32.223	49.488	45.933	104.114	5.643	0.318	437.913	0.133	245.296	6.45	0.029	2.355	1.569	0.46	0.26	0.018	0.016	0.033	3.411	725.867	317.867	0.408	151.138	98.338	68.391
	30	42	4	2	921.52	780.22	634.14	0.922	0.72	0.585	22.77	14.489	30.709	46.331	40.184	88.044	4.631	0.291	404.004	0.156	266.711	6.43	0.045	2.299	1.558	0.425	0.243	0.019	0.019	0.035	3.663	719.635	290.735	0.429	146.498	96.374	47.864
	40	21	1	2	906.91	804.89	566.16	0.907	0.73	0.514	25.556	18.993	36.074	54.333	40.197	108.903	6.107	0.378	517.332	0.161	313.808	6.54	0.046	2.424	1.555	0.53	0.257	0.024	0.018	0.039	2.932	730.109	377.709	0.352	155.358	97.342	125.009
	40	21	2	2	909.76	809.52	619.53	0.91	0.737	0.564	26.318	16.899	31.153	41.906	41.239	90.722	4.225	0.353	479.365	0.18	319.703	6.46	0.045	2.352	1.495	0.506	0.269	0.023	0.021	0.038	2.953	736.984	353.284	0.384	150.942	95.53	106.813
	40	21	3	2	910.5	815.42	556.06	0.911	0.743	0.507	32.725	23.877	37.025	44.881	42.648	115.487	6.552	0.343	461.694	0.107	210.614	6.46	0.045	2.414	1.533	0.546	0.263	0.024	0.007	0.041	2.806	742.885	342.985	0.4	155.732	96.798	90.455
	40	21	4	2	914.56	798.76	540.15	0.915	0.731	0.494	27.726	22.176	36.891	47.234	43.786	112.065	6.13	0.426	583.759	0.19	384.474	6.54	0.041	2.492	1.596	0.553	0.251	0.028	0.022	0.041	2.885	730.587	426.487	0.304	158.961	98.674	168.851
	40	28	1	2	922.1	800.24	618.62	0.923	0.738	0.571	32.174	22.357	32.923	43.322	43.655	108.544	7.703	0.304	411.309	0.136	238.476	6.45	0.039	2.387	1.555	0.498	0.26	0.02	0.015	0.039	3.124	738.418	303.718	0.435	153.175	97.64	52.902
	40	28	2	2	922.32	796.75	565.67	0.923	0.735	0.522	32.731	22.454	31.227	44.262	43.092	107.903	5.777	0.327	445.341	0.114	218.758	6.47	0.04	2.346	1.526	0.495	0.254	0.02	0.016	0.035	3.083	735.226	327.426	0.408	150.669	95.688	81.069
	40	28	3	2	924.49	792.05	564.93	0.925	0.733	0.523	28.234	12.89	36.786	50.788	42.823	105.253	7.635	0.332	452.695	0.122	232.661	6.5	0.042	2.423	1.585	0.508	0.252	0.023	0.018	0.037	3.122	732.682	331.682	0.401	154.981	98.333	78.367
	40	28	4	2	925.02	780.68	512.41	0.926	0.723	0.474	26.832	20.034	34.481	47.143	40.855	103.31	7.606	0.36	497.833	0.111	234.925	6.56	0.047	2.312	1.512	0.486	0.231	0.026	0.02	0.036	3.109	722.867	359.867	0.363	147.223	92.968	119.676
	40	35	1	2	931.93	809.54	541.99	0.932	0.755	0.505	25.295	20.085	32.784	46.867	44.18	102.973	4.237	0.304	403.043	0.055	108.359	6.41	0.04	2.323	1.488	0.512	0.259	0.018	0.012	0.034	2.909	754.661	304.161	0.45	150.093	94.314	59.754
	40	35	2	2	929.53	816.97	514.41	0.93	0.76	0.478	26.009	19.703	32.233	43.066	47.512	102.496	6.133	0.344	452.713	0.063	130.815	6.4	0.033	2.362	1.52	0.517	0.261	0.018	0.012	0.034	2.941	759.93	344.03	0.416	152.533	95.994	95.502
	40	35	3	2	931.79	809.5	537.14	0.933	0.755	0.501	31.065	21.951	34.809	45.958	45.551	112.931	6.605	0.322	426.405	0.068	135.56	6.43	0.045	2.404	1.549	0.525	0.259	0.019	0.015	0.037	2.95	754.887	321.887	0.433	154.702	97.195	69.99
	40	35	4	2	931.49	791	512.81	0.932	0.737	0.478	23.811	18.228	34.562	47.145	40.312	97.596	3.793	0.315	426.773	0.055	115.807	6.48	0.033	2.318	1.543	0.481	0.231	0.019	0.008	0.037	3.21	737.177	314.607	0.423	148.591	94.409	71.607
	40	42	1	2	923.51	793.8	610.17	0.924	0.734	0.564	24.851	19.491	39.34	52.907	45.286	115.771	7.738	0.293	400.018	0.124	219.454	6.48	0.05	2.372	1.553	0.478	0.26	0.02	0.02	0.04	3.247	733.522	293.422	0.44	151.622	97.601	44.2
	40	42	2	2	926.71	793	606.84	0.927	0.735	0.562	25.054	19.955	34.666	47.538	44.947	105.879	5.915	0.278	378.057	0.105	187.264	6.5	0.039	2.21	1.474	0.401	0.27	0.02	0.005	0.039	3.672	734.955	277.855	0.457	142.009	94.829	41.016
	40	42	3	2	924.01	800.45	499.89	0.924	0.74	0.462	28.209	20.321	36.928	48.802	45.065	112.599	7.3	0.358	483.541	0.08	173.019	6.45	0.037	2.442	1.599	0.473	0.28	0.022	0.027	0.042	3.379	739.846	357.746	0.382	155.718	101.629	100.399
	40	42	4	2	924.75	785.57	591.06	0.925	0.727	0.547	25.759	18.997	38.101	49.428	39.96	105.846	6.497	0.343	472.306	0.163	298.648	6.49	0.044	3.22	2.493	0.383	0.256	0.021	0.027	0.04	6.505	726.746	343.246	0.384	200.642	142.57	0.034
	30	21	1	2	918.82	805.17	571.81	0.919	0.74	0.526	22.134	15.91	31.676	43.791	38.232	85.358	5.551	0.434	585.587	0.219	416.462	6.6	0.053	2.565	1.612	0.524	0.267	0.031	0.062	0.069	3.076	740.324	433.524	0.307	159.127	100.965	173.432
	30	21	2	2	919.46	809.24	522.42	0.92	0.744	0.48	26.723	18.634	32.914	42.572	41.169	94.946	6.294	0.441	592.455	0.177	368.704	6.45	0.044	2.632	1.638	0.557	0.279	0.031	0.061	0.065	2.941	744.213	440.913	0.303	164.219	103.251	173.442
	30	21	3	2	916.55	801.17	485.97	0.917	0.735	0.446	24.48	18.877	34.85	49.735	41.038	103.628	5.865	0.451	614.079	0.162	363.771	6.6	0.045	2.703	1.669	0.601	0.279	0.034	0.051	0.068	2.777	734.606	451.106	0.284	169.321	104.633	177.151
	30	21	4	2	913.81	794.71	507.98	0.915	0.727	0.465	22.203	16.203	33.443	51.274	45.696	103.433	5.815	0.529	727.075	0.266	573.022	6.62	0.046	2.718	1.682	0.577	0.279	0.039	0.068	0.073	2.913	726.94	528.54	0.198	168.364	105.354	254.822
	30	28	1	2	922.51	798.42	571.27	0.923	0.737	0.527	20.825	14.404	29.747	48.51	44.257	92.377	5.571	0.403	546.897	0.193	366.733	6.48	0.039	2.616	1.693	0.507	0.276	0.025	0.054	0.061	3.337	736.698	402.898	0.334	163.516	105.681	133.701
	30	28	2	2	919.74	796.48	592.56	0.92	0.733	0.545	19.26	13.559	25.967	40.47	41.979	75.391	4.222	0.402	548.156	0.214	392.661	6.54	0.041	2.547	1.638	0.502	0.257	0.024	0.064	0.061	3.264	732.774	401.674	0.331	158.217	101.378	142.079
	30	28	3	2	919.02	787.32	572.87	0.92	0.724	0.527	21.434	15.158	30.933	42.806	41.873	86.666	4.735	0.421	580.871	0.223	423.972	6.58	0.044	2.607	1.666	0.522	0.271	0.027	0.058	0.064	3.193	724.359	420.759	0.304	162.525	103.908	154.326
	30	28	4	2	926.79	789.6	558.85	0.927	0.732	0.518	21.21	14.328	31.029	49.911	41.183	92.075	5.34	0.383	522.549	0.169	325.409	6.62	0.039	2.726	1.768	0.536	0.256	0.032	0.066	0.067	3.3	732.013	382.513	0.35	168.454	107.464	106.594
	30	35	1	2	927.54	815.11	576.95	0.929	0.757	0.536	20.43	14.424	30.493	45.02	40.313	84.7	4.221	0.385	508.689	0.164	305.88	6.54	0.036	2.634	1.668	0.555	0.281	0.025	0.044	0.06	3.003	756.954	385.054	0.372	166.072	104.907	114.075
	30	35	2	2	930.26	809.7	531.79	0.931	0.754	0.495	19.457	12.937	27.444	47.004	43.337	84.215	4.757	0.365	484.848	0.107	215.634	6.57	0.032	2.539	1.63	0.494	0.281	0.024	0.051	0.06	3.298	753.759	365.459	0.388	159.238	103.182	103.039
	30	35	3	2	934.01	818.23	611.46	0.935	0.765	0.572	18.766	10.737	23.101	37.393	39.48	63.45	2.701	0.409	534.08	0.215	376.525	6.53	0.03	2.368	1.532	0.44	0.261	0.024	0.053	0.058	3.479	765.152	408.652	0.357	147.642	96.773	164.237
	30	35	4	2	931.92	807.77	590.21	0.932	0.753	0.55	21.926	14.746	29.269	45.914	37.673	83.57	5.012	0.399	530.101	0.196	356.889	6.65	0.035	2.671	1.764	0.527	0.26	0.024	0.037	0.059	3.344	752.928	399.128	0.354	167.859	107.589	123.68
	30	42	1	2	922.05	807.1	613.65	0.923	0.745	0.566	21.76	14.417	29.021	47.255	39.829	86.866	5.552	0.385	517.432	0.207	365.305	6.54	0.031	2.607	1.696	0.512	0.271	0.023	0.045	0.059	3.314	744.559	385.259	0.359	163.693	105.447	116.118
	30	42	2	2	921.5	798.16	649.68	0.922	0.736	0.599	19.509	12.581	26.603	44.214	42.128	79.173	4.696	0.355	482.215	0.218	363.878	6.65	0.036	2.601	1.707	0.492	0.259	0.024	0.058	0.061	3.468	736.019	354.919	0.381	161.786	104.86	88.273
	30	42	3	2	914.04	794.13	591.45	0.914	0.726	0.541	20.374	12.842	26.214	43.225	45.002	81.939	4.284	0.367	505.832	0.182	336.489	6.7	0.038	2.577	1.689	0.49	0.267	0.024	0.05	0.059	3.45	725.867	367.167	0.359	161.166	104.689	101.311
	30	42	4	2	921.52	780.22	634.14	0.922	0.719	0.584	21.167	12.366	26.294	45.091	43.638	82.796	3.989	0.389	541.439	0.255	435.805	6.7	0.043	2.667	1.786	0.489	0.256	0.024	0.052	0.061	3.654	718.988	389.288	0.33	165.962	108.35	114.976
	40	21	1	2	906.91	804.89	566.16	0.907	0.73	0.514	22.609	15.206	31.696	52.224	41.96	97.362	7.82	0.491	671.999	0.274	533.693	6.68	0.058	2.671	1.726	0.526	0.278	0.033	0.038	0.069	3.283	730.182	490.682	0.24	167.087	107.442	216.152
	40	21	2	2	909.76	809.52	619.53	0.91	0.737	0.564	21.238	15.152	29.909	46.917	41.581	88.928	4.496	0.399	541.825	0.226	401.318	6.63	0.039	2.581	1.63	0.533	0.273	0.029	0.05	0.067	3.06	736.837	399.237	0.338	161.384	102.36	135.494
	40	21	3	2	910.5	815.42	556.06	0.911	0.743	0.506	20.409	14.702	29.757	47.624	40.676	86.605	4.573	0.43	578.543	0.193	381.966	6.62	0.041	2.572	1.621	0.553	0.273	0.029	0.032	0.063	2.932	742.663	429.663	0.313	162.42	101.953	165.29
	40	21	4	2	914.56	798.76	540.15	0.915	0.731	0.494	20.566	14.516	32.247	49.559	39.39	90.445	6.159	0.5	684.142	0.263	532.918	6.58	0.051	2.676	1.713	0.538	0.267	0.034	0.052	0.07	3.182	731.025	500.125	0.231	166.313	105.839	227.973
	40	28	1	2	922.1	800.24	618.62	0.923	0.739	0.571	25.597	16.863	29.173	45.143	39.986	91.301	5.452	0.377	511.079	0.21	367.537	6.51	0.038	2.607	1.709	0.52	0.269	0.023	0.03	0.056	3.286	738.565	377.465	0.361	164.82	105.794	106.851
	40	28	2	2	922.32	796.75	565.67	0.922	0.735	0.522	25.976	16.781	30.909	46.04	42.696	97.215	7.825	0.419	570.257	0.206	394.705	6.59	0.046	2.482	1.633	0.46	0.264	0.025	0.04	0.06	3.55	734.858	419.058	0.316	155.404	101.83	161.824
	40	28	3	2	924.49	792.05	564.93	0.924	0.732	0.522	26.74	16.589	31.606	46.959	40.919	97.729	7.029	0.395	539.36	0.185	354.168	6.62	0.05	2.545	1.653	0.496	0.264	0.028	0.044	0.06	3.333	732.242	394.942	0.337	159.221	102.68	133.041
	40	28	4	2	925.02	780.68	512.41	0.926	0.723	0.474	26.328	16.128	30.578	44.348	36.613	88.466	6.365	0.478	661.557	0.23	484.367	6.75	0.055	2.588	1.691	0.499	0.252	0.036	0.048	0.063	3.388	722.722	478.122	0.245	160.706	103.415	214.001
	40	35	1	2	931.93	809.54	541.99	0.932	0.755	0.505	20.571	16.583	27.897	46.211	41.327	86.701	6.407	0.383	507.643	0.134	264.594	6.58	0.03	2.498	1.575	0.519	0.281	0.025	0.038	0.061	3.033	754.736	383.136	0.372	157.792	100.502	124.842
	40	35	2	2	929.53	816.97	514.41	0.931	0.76	0.479	21.79	15.893	30.11	45.217	43.682	91.175	1.357	0.384	504.906	0.102	213.707	6.6	0.046	NA	NA	NA	NA	NA	NA	NA	NA	760.461	383.961	0.377	NA	NA	NA
	40	35	3	2	931.79	809.5	537.14	0.933	0.755	0.501	21.707	16.742	31.879	45.062	39.935	89.6	5.351	0.36	477.406	0.106	212.421	6.62	0.047	2.803	1.828	0.534	0.293	0.026	0.056	0.066	3.426	754.887	360.387	0.395	175.116	113.721	71.55
	40	35	4	2	931.49	791	512.81	0.932	0.737	0.478	20.055	16.973	34.801	51.63	43.882	101.554	7.296	0.396	537.563	0.137	286.7	6.6	0.052	2.809	1.831	0.555	0.286	0.027	0.039	0.07	3.296	737.398	396.398	0.341	176.267	113.151	106.98
	40	42	1	2	923.51	793.8	610.17	0.925	0.734	0.564	20.9	14.958	32.366	46.426	40.233	89.117	6.817	0.367	500.569	0.198	350.266	6.69	0.054	2.612	1.706	0.464	0.278	0.027	0.066	0.07	3.676	734.035	367.435	0.367	161.275	106.582	99.579
	40	42	2	2	926.71	793	606.84	0.927	0.735	0.563	18.777	15.519	27.049	43.342	38.496	77.408	5.5	0.364	495.001	0.191	340.082	6.71	0.04	2.54	1.667	0.454	0.276	0.025	0.056	0.062	3.673	735.248	363.948	0.371	158.1	104.634	101.215
	40	42	3	2	924.01	800.45	499.89	0.925	0.741	0.462	20.552	16.819	33.244	52.159	45.937	102.823	7.247	0.41	553.957	0.132	285.772	6.66	0.049	2.707	1.75	0.516	0.292	0.027	0.057	0.065	3.392	740.511	410.211	0.33	169.054	109.941	131.217
	40	42	4	2	924.75	785.57	591.06	0.926	0.727	0.547	21.349	15.098	32.752	47.028	40.608	91.025	4.966	0.388	533.864	0.208	380.464	6.8	0.055	2.752	1.816	0.486	0.273	0.028	0.074	0.074	3.736	727.255	388.255	0.339	169.176	111.451	107.628
	30	21	1	2	918.82	805.17	571.81	0.919	0.74	0.526	24.628	21.64	35.749	49.361	42.306	114.866	5.315	0.428	578.749	0.214	406.833	6.59	0.054	2.856	1.801	0.615	0.303	0.038	0.04	0.059	2.926	740.176	428.376	0.312	180.435	113.175	134.766
	30	21	2	2	919.46	809.24	522.42	0.92	0.745	0.481	25.805	21.679	33.561	44.783	42.142	108.877	5.233	0.448	602.02	0.184	383.521	6.48	0.046	2.813	1.75	0.623	0.308	0.038	0.037	0.058	2.81	744.51	448.21	0.296	178.326	111.136	158.748
	30	21	3	2	916.55	801.17	485.97	0.917	0.735	0.446	27.226	24.05	43.358	49.042	62.331	146.134	3.039	0.493	670.192	0.203	456.279	6.56	0.055	2.922	1.792	0.684	0.316	0.043	0.028	0.059	2.621	734.973	492.573	0.242	186.11	113.804	192.659
	30	21	4	2	913.81	794.71	507.98	0.914	0.727	0.464	29.911	23.4	38.536	52.911	44.371	130.142	6.656	0.517	711.358	0.255	548.433	6.66	0.064	3.012	1.852	0.692	0.317	0.047	0.038	0.067	2.677	726.504	516.804	0.21	190.37	116.763	209.672
	30	28	1	2	922.51	798.42	571.27	0.923	0.737	0.528	26.058	17.392	33.39	44.388	43.472	106.399	6.085	0.362	491.514	0.153	289.329	6.55	0.044	2.684	1.721	0.551	0.305	0.029	0.025	0.052	3.124	737.287	362.387	0.375	171.089	109.698	81.6
	30	28	2	2	919.74	796.48	592.56	0.92	0.733	0.545	25.121	16.823	30.82	48.336	44.9	107.477	7.346	0.406	553.748	0.218	400.178	6.51	0.046	2.789	1.82	0.568	0.294	0.028	0.025	0.054	3.204	732.994	405.894	0.327	177.262	113.368	115.265
	30	28	3	2	919.02	787.32	572.87	0.92	0.724	0.527	25.335	18.381	32.629	44.757	48.234	110.87	5.179	0.423	583.77	0.226	427.957	6.54	0.05	2.827	1.765	0.639	0.311	0.033	0.024	0.055	2.761	724.359	422.859	0.302	180.732	112.124	130.003
	30	28	4	2	926.79	789.6	558.85	0.927	0.732	0.518	25.159	16.346	33.385	53.95	41.192	112.021	6.902	0.423	578.338	0.209	404.234	6.64	0.049	2.836	1.857	0.576	0.287	0.037	0.022	0.056	3.222	731.867	423.267	0.309	179.53	114.499	129.238
	30	35	1	2	927.54	815.11	576.95	0.929	0.757	0.536	27.331	19.783	32.526	45.918	43.889	110.77	4.59	0.328	433.595	0.107	199.788	6.5	0.041	2.825	1.739	0.663	0.316	0.03	0.027	0.05	2.622	756.879	328.179	0.429	181.39	111.292	35.497
	30	35	2	2	930.26	809.7	531.79	0.931	0.754	0.495	24.599	17.262	30.387	45.877	48.16	107.63	5.951	0.372	493.187	0.113	228.33	6.46	0.039	2.797	1.764	0.6	0.328	0.029	0.025	0.052	2.939	753.533	371.633	0.382	179.275	113.706	78.651
	30	35	3	2	934.01	818.23	611.46	0.934	0.765	0.571	23.763	18.701	35.735	48.511	43.61	111.757	6.488	0.412	538.546	0.219	382.502	6.45	0.041	2.842	1.764	0.656	0.324	0.03	0.014	0.052	2.688	764.541	411.741	0.353	183.16	113.304	115.277
	30	35	4	2	931.92	807.77	590.21	0.932	0.753	0.55	21.754	16.045	29.258	45.243	42.796	96.2	5.651	0.367	486.876	0.164	297.731	6.48	0.043	2.872	1.865	0.612	0.294	0.028	0.025	0.049	3.05	753.229	366.729	0.387	183.164	115.4	68.165
	30	42	1	2	922.05	807.1	613.65	0.922	0.744	0.566	25.153	16.321	25.318	43.56	41.661	93.665	4.691	0.338	454.358	0.16	282.347	6.56	0.039	2.627	1.683	0.567	0.286	0.025	0.02	0.046	2.97	744.261	338.161	0.406	168.268	106.056	63.837
	30	42	2	2	921.5	798.16	649.68	0.922	0.736	0.599	24.028	17.681	37.556	51.752	40.729	112.789	6.913	0.384	522.6	0.248	413.494	6.62	0.049	2.819	1.82	0.542	0.307	0.03	0.053	0.067	3.358	735.652	384.452	0.351	176.485	114.622	93.344
	30	42	3	2	914.04	794.13	591.45	0.915	0.727	0.541	25.931	17.9	36.245	52.73	46.897	121.646	6.321	0.38	522.751	0.194	359.206	6.64	0.049	2.851	1.838	0.551	0.317	0.03	0.048	0.067	3.333	726.665	379.865	0.347	179.134	116.378	84.354
	30	42	4	2	921.52	780.22	634.14	0.922	0.719	0.585	23.211	15.267	34.486	50.459	43.796	108.702	6.316	0.351	488.462	0.217	370.625	6.6	0.054	2.902	1.896	0.557	0.307	0.031	0.045	0.066	3.401	719.204	351.304	0.368	182.182	118.225	50.897
	40	21	1	2	906.91	804.89	566.16	0.907	0.73	0.514	25.806	19.58	40.193	59.375	50.036	136.656	4.741	0.459	629.133	0.243	472.752	6.64	0.063	3.018	1.888	0.636	0.333	0.042	0.042	0.077	2.967	730.182	459.382	0.271	189.806	120.048	149.529
	40	21	2	2	909.76	809.52	619.53	0.91	0.737	0.564	28.816	21.065	35.651	53.57	44.402	124.288	8.151	0.429	582.394	0.256	454.327	6.57	0.054	3.078	1.941	0.644	0.334	0.038	0.05	0.072	3.014	737.058	429.258	0.308	193.623	122.65	112.985
	40	21	3	2	910.5	815.42	556.06	0.911	0.743	0.507	25.696	19.742	40.333	55.631	46.535	128.853	7.959	0.424	571.132	0.188	371.097	6.5	0.056	3.033	1.878	0.687	0.337	0.039	0.021	0.071	2.735	742.885	424.285	0.319	193.362	119.896	111.027
	40	21	4	2	914.56	798.76	540.15	0.915	0.731	0.494	25.206	19.908	44.127	56.994	46.65	133.874	7.876	0.518	709.246	0.282	570.04	6.59	0.064	3.038	1.904	0.637	0.329	0.045	0.045	0.078	2.987	730.514	518.114	0.212	190.573	120.515	207.026
	40	28	1	2	922.1	800.24	618.62	0.923	0.738	0.571	25.1	18.944	34.916	48.392	44.316	112.444	4.273	0.365	493.833	0.197	345.228	6.56	0.046	2.814	1.782	0.582	0.323	0.03	0.034	0.064	3.062	738.492	364.692	0.374	178.572	114.185	71.935
	40	28	2	2	922.32	796.75	565.67	0.923	0.735	0.522	26.389	19.201	32.323	49.708	43.105	111.021	6.785	0.404	549.935	0.191	366.081	6.66	0.053	2.948	1.907	0.579	0.316	0.031	0.052	0.062	3.291	735.005	404.205	0.331	185.28	119.56	99.366
	40	28	3	2	924.49	792.05	564.93	0.925	0.732	0.522	27.655	21.7	36.881	49.21	43.255	120.349	4.752	0.391	533.764	0.181	346.322	6.65	0.055	2.951	1.889	0.611	0.313	0.035	0.04	0.062	3.093	732.462	390.962	0.341	186.312	118.385	86.265
	40	28	4	2	925.02	780.68	512.41	0.926	0.723	0.474	25.22	21.48	35.249	45.958	36.609	105.553	6.358	0.404	558.519	0.155	327.384	6.73	0.062	2.803	1.813	0.529	0.296	0.038	0.061	0.066	3.425	722.795	403.695	0.319	174.15	113.278	116.266
	40	35	1	2	931.93	809.54	541.99	0.932	0.754	0.505	27.094	22.778	33.364	50.464	47.288	121.92	4.315	0.371	491.805	0.122	240.937	6.47	0.043	2.913	1.832	0.649	0.328	0.028	0.019	0.057	2.823	754.435	371.035	0.383	186.991	116.932	67.112
	40	35	2	2	929.53	816.97	514.41	0.93	0.76	0.478	29.485	23.341	29.889	35.224	29	88.406	5.642	0.38	499.954	0.098	205.842	6.48	0.039	2.857	1.793	0.634	0.317	0.029	0.027	0.057	2.83	759.93	379.93	0.38	182.589	114.089	83.251
	40	35	3	2	931.79	809.5	537.14	0.932	0.755	0.501	29.929	25.453	35.219	48.973	42.869	123.374	8.259	0.397	525.312	0.143	284.619	6.57	0.04	2.799	1.752	0.611	0.322	0.03	0.025	0.06	2.868	754.812	396.512	0.358	178.773	112.529	105.21
	40	35	4	2	931.49	791	512.81	0.932	0.737	0.478	28.3	21.469	36.38	48.959	41.878	118.352	8.507	0.388	525.812	0.128	268.574	6.6	0.049	2.841	1.845	0.593	0.288	0.03	0.025	0.06	3.112	737.472	387.772	0.35	180.108	113.99	93.673
	40	42	1	2	923.51	793.8	610.17	0.924	0.733	0.563	26.961	19.252	33.33	46.654	38.442	105.613	7.587	0.365	497.601	0.195	346.404	6.64	0.05	2.836	1.868	0.538	0.289	0.029	0.049	0.062	3.471	733.082	364.782	0.368	177.502	115.272	72.008
	40	42	2	2	926.71	793	606.84	0.928	0.736	0.563	26.273	18.76	27.943	42.551	39.379	95.614	6.554	0.339	460.668	0.166	295.217	6.6	0.041	2.806	1.847	0.542	0.287	0.027	0.045	0.057	3.405	735.91	339.01	0.397	176.352	114.041	48.617
	40	42	3	2	924.01	800.45	499.89	0.925	0.74	0.462	30.516	27.777	41.221	58.481	55.743	154.256	9.041	0.408	550.851	0.13	280.8	6.57	0.063	3.225	2.002	0.649	0.395	0.036	0.063	0.08	3.084	740.289	407.789	0.333	203.143	131.272	73.375
	40	42	4	2	924.75	785.57	591.06	0.925	0.727	0.547	30.577	24.322	42.75	58.472	51.203	148.167	4.136	0.401	551.288	0.221	403.623	6.62	0.061	3.258	2.075	0.608	0.375	0.038	0.074	0.087	3.413	726.746	400.646	0.326	202.702	133.008	64.936
