# Supplementary material for: Understanding the impacts of intensity and harvest frequency on Tithonia diversifolia for use in tropical silvopastoral systems
Source: Research Square preprint supplement (doi:10.21203/rs.3.rs-4273074/v1), 2024-04-19
Supplement: Supplementary file 2 [file f59554dbcc1a3da39e13560c.xlsx]

## Sheet: Plan1
	Understanding the impacts of intensity and harvest frequency on Tithonia diversifolia for use in tropical silvopastoral systems; Agroforestry Systems; V. Ovani, S. Pérez-Márquez, A. Monteiro, A. M. Kruger, P. M. T. Lima, B. E. Bizzuti, L. S. Takahashi, H. Louvandini, and A. L. Abdalla; University of São Paulo; e-mail: vagnerovani@usp.br.
	Cut	Intensity	Frequency	Block	Height	Branches	Fresh biomass	DM biomass	DM Leaf	DM stem	DM dead material	DM	Ash	OM	CP	EE	aNDFom	aADFom	aLDAom	Temperature	RH	Rainfall	Radiation
	1	30	21	1	50.67	43.33	540	46.89	825.33	174.67	0	894.21	111.22	888.78	28.81	31.1	555.45	314	127.25	24.24	76.37	54.7	21.74
	1	30	21	2	45.5	22.5	135	16.55	894.98	105.02	0	896.95	103.34	896.66	22.37	37.15	524.19	331.13	154.41	24.24	76.37	54.7	21.74
	1	30	21	3	43.67	33.67	198.33	23.55	864.74	135.26	0	900.53	99.43	900.57	30.58	42.45	499.31	343.36	150.97	24.24	76.37	54.7	21.74
	1	30	21	4	43.33	18.33	140	17.84	844.73	155.27	0	894.98	100.54	899.46	28.4	34.72	571.26	348.51	171.07	24.24	76.37	54.7	21.74
	1	40	21	1	55.33	44.33	276.67	28.54	819.55	180.45	0	896.89	102.43	897.57	26.68	37.36	564.76	343.7	156.22	24.24	76.37	54.7	21.74
	1	40	21	2	61	46.33	405	39.75	839.99	160.01	0	896.89	105.62	894.38	30.02	37.66	546.79	366.12	168.41	24.24	76.37	54.7	21.74
	1	40	21	3	57	54	476.67	42.97	831.07	168.93	0	893.24	104.56	895.44	27.19	37.74	526.94	354.16	140.84	24.24	76.37	54.7	21.74
	1	40	21	4	66.33	48.67	405	35.36	829.22	170.78	0	905.99	104.62	895.38	27.48	30.68	534.3	326.62	138.23	24.24	76.37	54.7	21.74
	1	30	28	1	65.33	61.67	966.67	100.13	810.55	189.45	0	893.16	107.52	892.48	24.42	33.06	557.34	385.12	169.97	24.04	77.93	93.4	20.71
	1	30	28	2	78	46.67	1103.33	113.97	742.39	257.61	0	892.45	124.32	875.68	25.19	28.33	480.51	386.08	166.9	24.04	77.93	93.4	20.71
	1	30	28	3	71	32.5	887.5	95.58	757.26	242.74	0	861.62	111.95	888.05	24.8	33.27	540.15	408.14	159.74	24.04	77.93	93.4	20.71
	1	30	28	4	83.67	62	1583.33	163.4	691.38	308.62	0	897.58	106.45	893.55	22.18	25.95	552.91	423.42	154.63	24.04	77.93	93.4	20.71
	1	40	28	1	80.33	52.67	1125	117.06	781.64	218.36	0	892.45	101.8	898.2	22	37.65	559.24	431.17	171.73	24.04	77.93	93.4	20.71
	1	40	28	2	80.67	35.67	710	53.63	778.98	221.02	0	904.99	106.2	893.8	27.9	25.12	536.92	367.26	156.64	24.04	77.93	93.4	20.71
	1	40	28	3	91.33	57.67	1280	120.83	686.86	313.14	0	890.89	103.66	896.34	18.91	29.4	526.38	378.65	132.43	24.04	77.93	93.4	20.71
	1	40	28	4	95	50.33	1306.67	135.73	765.81	234.19	0	875.94	101.92	898.08	22.83	26.7	490.08	337.88	123.82	24.04	77.93	93.4	20.71
	1	30	35	1	101.67	57.67	1653.33	152.91	574.89	425.11	0	905.06	105.37	894.63	18.58	27.82	560.25	419.77	164.56	23.73	79.56	221.9	19.93
	1	30	35	2	93.33	73.67	2246.67	212.98	573.87	426.13	0	907.67	102.38	897.62	17.27	30.39	608.13	412.42	153.73	23.73	79.56	221.9	19.93
	1	30	35	3	118	43.33	2001.67	202.23	789.54	210.46	0	886.28	102.4	897.6	19.22	27.85	610.18	426.26	171.61	23.73	79.56	221.9	19.93
	1	30	35	4	94.67	37.33	1253.33	109.93	625.2	374.8	0	907.13	103.83	896.17	23.01	29.47	570.29	432.67	199.93	23.73	79.56	221.9	19.93
	1	40	35	1	128.33	77.33	3346.67	309.03	614.97	385.03	0	897.69	103.9	896.1	16.13	24.5	582.46	414.9	122.4	23.73	79.56	221.9	19.93
	1	40	35	2	112.33	60	2433.33	233.12	581.78	418.22	0	897.16	100.05	899.95	18.26	39.22	584.44	447.68	168.8	23.73	79.56	221.9	19.93
	1	40	35	3	119.33	40	1953.33	204.86	583.49	416.51	0	901.57	107.79	892.21	19.63	35.76	541.56	406.11	135.78	23.73	79.56	221.9	19.93
	1	40	35	4	139.67	49.33	2761.67	265.89	580.78	419.22	0	912.52	94.55	905.45	18.97	30.95	602.17	433.11	147.51	23.73	79.56	221.9	19.93
	1	30	42	1	125.33	63.67	3316.67	359.26	500.31	481.53	18.16	882.77	95.79	904.21	14.24	22.76	665.18	547.18	190.24	23.88	79.13	223	19.98
	1	30	42	2	122.67	62	3293.33	458.19	464.11	487.41	48.47	910.43	88.1	911.9	14.35	28.66	661.42	511.68	205.11	23.88	79.13	223	19.98
	1	30	42	3	112.33	47.67	2033.33	235.75	549.23	427.52	23.26	915.45	92.5	907.5	13.8	24.95	606.27	475.25	162.42	23.88	79.13	223	19.98
	1	30	42	4	140	41	2931.67	296.01	516.55	457.37	26.07	910.62	94.15	905.85	15.38	22.82	614.01	498.25	163.27	23.88	79.13	223	19.98
	1	40	42	1	152.67	58.33	4805	494.32	499.36	495.38	5.25	901.95	98.03	901.97	14.03	22.22	615.77	477.01	148.18	23.88	79.13	223	19.98
	1	40	42	2	143.33	79.33	3866.67	435.69	437.71	537.24	25.06	915.29	87.91	912.09	12.4	20.86	588.76	447.8	133.43	23.88	79.13	223	19.98
	1	40	42	3	123.33	66.33	2576.67	313.78	513.22	457.89	28.89	915.69	96.75	903.25	14.17	27.78	582.81	452.16	145.53	23.88	79.13	223	19.98
	1	40	42	4	142.67	35.67	2238.33	273.37	535.26	420.27	44.47	913.85	90.64	909.36	14.71	23.18	541.89	435.58	134.19	23.88	79.13	223	19.98
	2	30	21	1	48	52.5	200	22.8	883.02	116.98	0	918.82	97.42	902.58	36.29	54.78	547.97	390.17	227.6	21.95	66.03	62.5	23.21
	2	30	21	2	43	96	245	29.55	902.11	97.89	0	919.46	95.38	904.62	28.91	44.28	507.44	298	150.19	21.95	66.03	62.5	23.21
	2	30	21	3	44.5	70.5	272.5	36.3	852.76	147.24	0	916.55	99.41	900.59	31.27	54.92	471.39	314.19	162.43	21.95	66.03	62.5	23.21
	2	30	21	4	48	67	322.5	39.76	834.74	165.26	0	913.81	102.65	897.35	30.08	39.59	481.28	366.6	172.9	21.95	66.03	62.5	23.21
	2	40	21	1	52	64	190	26.11	848.8	151.2	0	906.91	97.56	902.44	30.23	46.69	539.35	403.74	195.83	21.95	66.03	62.5	23.21
	2	40	21	2	57	113	435	54.33	885.18	114.82	0	909.76	95.24	904.76	28.39	45.04	592.34	378.6	210.67	21.95	66.03	62.5	23.21
	2	40	21	3	48.5	62	187.5	28.18	889.74	110.26	0	910.5	92.29	907.71	28.99	50.38	536.54	362.81	180.09	21.95	66.03	62.5	23.21
	2	40	21	4	57.5	81	402.5	46.3	824.75	175.25	0	914.56	100.62	899.38	30.16	41.72	512.19	361.63	168.91	21.95	66.03	62.5	23.21
	2	30	28	1	42	84.5	365	59.33	821.58	143.22	35.2	922.51	100.79	899.21	24.42	47.04	557.39	352.95	194.69	22.35	66.22	98.6	23.67
	2	30	28	2	55.5	84	427.5	55.19	824.58	164.79	10.63	919.74	101.76	898.24	23.62	57.38	578.24	379.27	197.67	22.35	66.22	98.6	23.67
	2	30	28	3	58	90.5	470	62.06	794.71	197.23	8.06	919.02	106.34	893.66	24.61	58.49	555.91	361.55	175.66	22.35	66.22	98.6	23.67
	2	30	28	4	57	69.5	400	62.98	779.87	210.47	9.66	926.79	105.2	894.8	25.73	62.55	543.8	415.21	203.2	22.35	66.22	98.6	23.67
	2	40	28	1	55	79.5	542.5	75.38	806.83	169.29	23.89	922.1	99.88	900.12	20.27	50.15	601.72	430.54	208.66	22.35	66.22	98.6	23.67
	2	40	28	2	54.5	88.5	265	40.67	825.86	158.72	15.42	922.32	101.63	898.37	23.17	53.06	548.16	401.89	189.49	22.35	66.22	98.6	23.67
	2	40	28	3	66	104.5	620	86.44	797.54	191.72	10.74	924.49	103.98	896.02	25.29	49.3	548.51	399.01	154.68	22.35	66.22	98.6	23.67
	2	40	28	4	65	79.5	417.5	70.16	810.86	167.87	21.27	925.02	109.66	890.34	27.67	50.15	497.33	292.4	131.23	22.35	66.22	98.6	23.67
	2	30	35	1	68	67.5	712.5	90.42	760.29	227.68	12.03	927.54	92.45	907.55	15.55	53.67	571.35	402.36	181.05	22.31	67.82	117.2	23.5
	2	30	35	2	50	101.5	415	65.25	823.36	110.86	65.78	930.26	95.15	904.85	23.02	58.64	522.77	365.98	210.7	22.31	67.82	117.2	23.5
	2	30	35	3	71.5	86.5	1302.5	153.9	750.9	237.81	11.29	934.01	90.88	909.12	20.44	48.1	604.41	416.9	189.44	22.31	67.82	117.2	23.5
	2	30	35	4	70.5	89.5	827.5	127.15	728.94	227.48	43.58	931.92	96.11	903.89	26.18	62.07	580.14	416.62	207.02	22.31	67.82	117.2	23.5
	2	40	35	1	58.5	106.5	427.5	67.63	863.21	106.23	30.57	931.93	95.23	904.77	21.23	67.18	534.91	364.04	212.04	22.31	67.82	117.2	23.5
	2	40	35	2	62.5	84	387.5	61.61	799.98	151.61	48.41	929.53	91.52	908.48	18.05	57.54	503.46	348.09	191.86	22.31	67.82	117.2	23.5
	2	40	35	3	72.5	73	580	77.51	758.97	202.61	38.42	931.79	95.25	904.75	18.26	50.73	528.78	387.1	182.4	22.31	67.82	117.2	23.5
	2	40	35	4	82	116.5	1360	176.07	725.22	247.77	27	931.49	104.5	895.5	23.8	49.1	504.04	353.43	167.09	22.31	67.82	117.2	23.5
	2	30	42	1	76.5	76	1232.5	131.88	707.89	283.22	8.89	922.05	96.45	903.55	18.29	50.96	604.57	418.98	150.55	22.55	70.09	160.1	22.47
	2	30	42	2	75	89.5	1210	135.64	746.42	240.9	12.68	921.5	100.92	899.08	27.11	50.49	640.78	393.41	185.1	22.55	70.09	160.1	22.47
	2	30	42	3	54.5	53	380	51.49	843.11	136.18	20.71	914.04	102.93	897.07	19.6	49.26	578.35	372.03	183.61	22.55	70.09	160.1	22.47
	2	30	42	4	105	56.5	1787.5	165.85	659.48	332.79	7.73	921.52	109.89	890.11	20.97	37.34	625.3	401.62	145.81	22.55	70.09	160.1	22.47
	2	40	42	1	95	57	1077.5	112.24	713.58	279.93	6.5	923.51	103.1	896.9	25.06	55.12	602.6	412.98	191.35	22.55	70.09	160.1	22.47
	2	40	42	2	68.5	58.5	655	83.86	825.12	166.29	8.59	926.71	103.5	896.5	20.11	60.3	593.27	392.79	189.5	22.55	70.09	160.1	22.47
	2	40	42	3	63	60	407.5	54.98	825.21	163.36	11.43	924.01	99.77	900.23	19.78	56.97	487.13	346.9	166.85	22.55	70.09	160.1	22.47
	2	40	42	4	97	58.5	1652.5	178.09	704.38	288.51	7.11	924.75	107.22	892.78	23.4	50.03	580.7	408.13	184	22.55	70.09	160.1	22.47
